# Supplementary material for: Identification of QTL for Tolerance to Flooding Stress at Seedling Stage of Soybean (Glycine max L. Merr.)
Source: MDPI journal article supplement (doi:10.3390/agronomy11050908), 2021-05-05
Supplement: s1 [file s1]

**Article title:** Identification of QTL for tolerance to flooding stress at seedling stage of soybean (*Glycine max* L. Merr.)

**Journal name:** Agronomy

**Authors name:** Sanjeev K. Dhungana, Hong-Sik Kim\*, Beom-Kyu Kang, Jeong-Hyun Seo, Hyun-Tae Kim, Sang-Ouk Shin, Jae-Hyeon Oh and In-Yeol Baek

**Email address of corresponding author:** [kimhongs@korea.kr](mailto:kimhongs@korea.kr)

**Supplementary Table S1.** Analysis of variance for chlorophyll content and shoot dry weight of recombinant inbred lines (RILs) under flooded condition in 2017 and 2018.

| Source of variation | DF <sup>1</sup> | Chlorophyll content |         |         | Shoot dry weight |         |         |
|---------------------|-----------------|---------------------|---------|---------|------------------|---------|---------|
|                     |                 | MS <sup>2</sup>     | F-value | P-value | MS               | F-value | P-value |
| RIL                 | 151             | 33.28               | 1.62    | <0.0001 | 0.16             | 1.48    | 0.0011  |
| Year                | 1               | 1.33                | 0.06    | 0.7991  | 1.17             | 10.67   | 0.0012  |
| RIL × Year          | 151             | 29.19               | 1.42    | 0.0023  | 0.15             | 1.35    | 0.0111  |

<sup>1</sup>Degree of freedom. <sup>2</sup>Mean square.
