# Supplementary material for: Identification of QTL for Tolerance to Flooding Stress at Seedling Stage of Soybean (Glycine max L. Merr.)
Source: MDPI journal article supplement (doi:10.3390/agronomy11050908), 2021-05-05

**Article title:** Identification of QTL for tolerance to flooding stress at seedling stage of soybean (*Glycine max* L. Merr.)

**Journal name:** Agronomy

**Authors name:** Sanjeev K. Dhungana, Hong-Sik Kim\*, Beom-Kyu Kang, Jeong-Hyun Seo, Hyun-Tae Kim, Sang-Ouk Shin, Jae-Hyeon Oh and In-Yeol Baek

**Email address of corresponding author:** [kimhongs@korea.kr](mailto:kimhongs@korea.kr)

**Supplementary Figure S1.** Genetic linkage maps of 20 chromosomes showing the total 1,689 SNPs used to identify the QTL for flooding tolerance in soybean. Distances of the loci (cM) are shown on the left and the name of SNPs are shown on the right side of each chromosome.

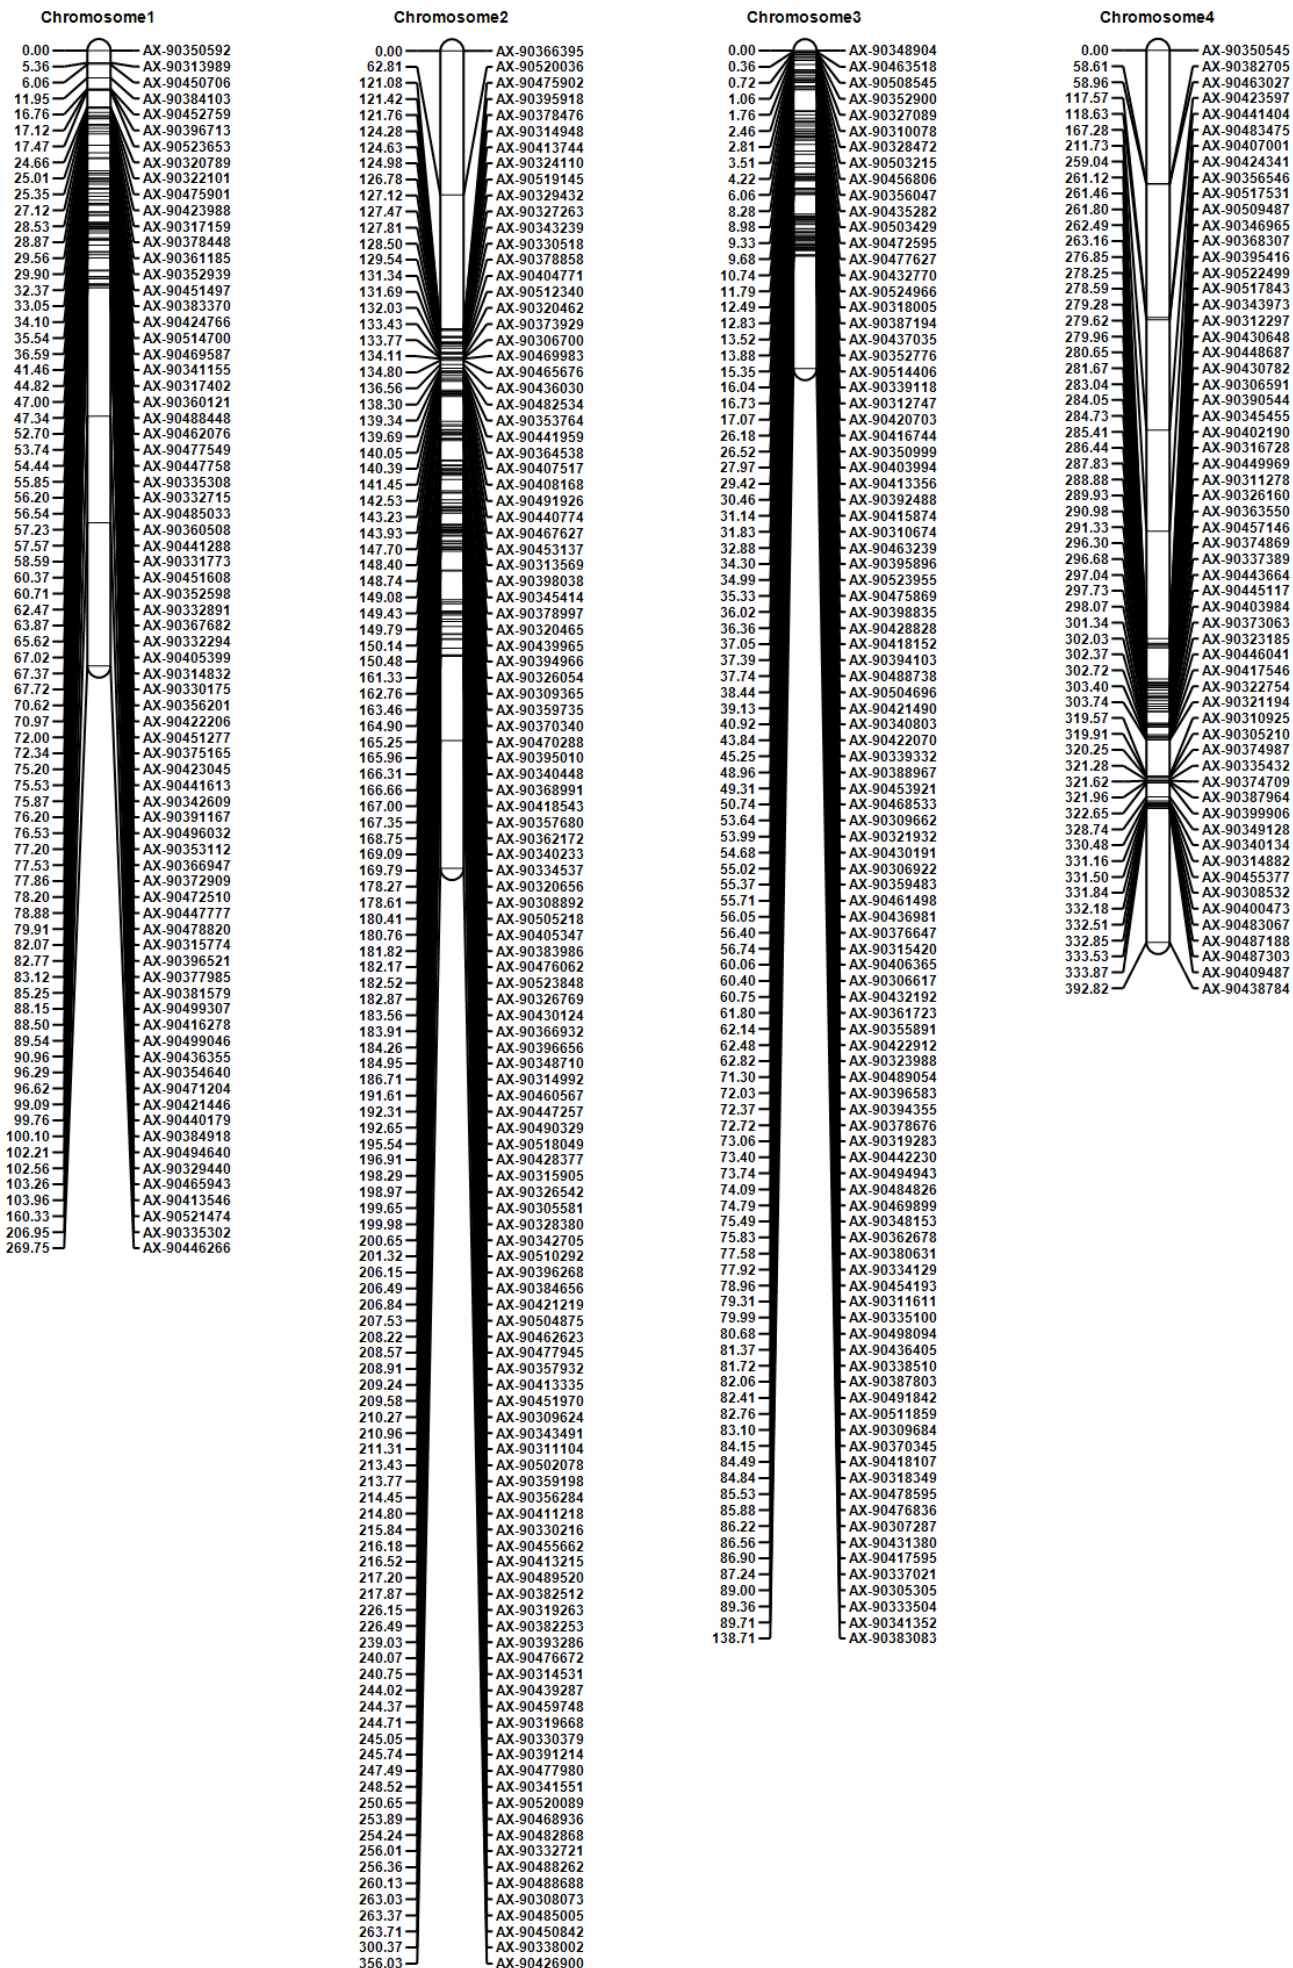

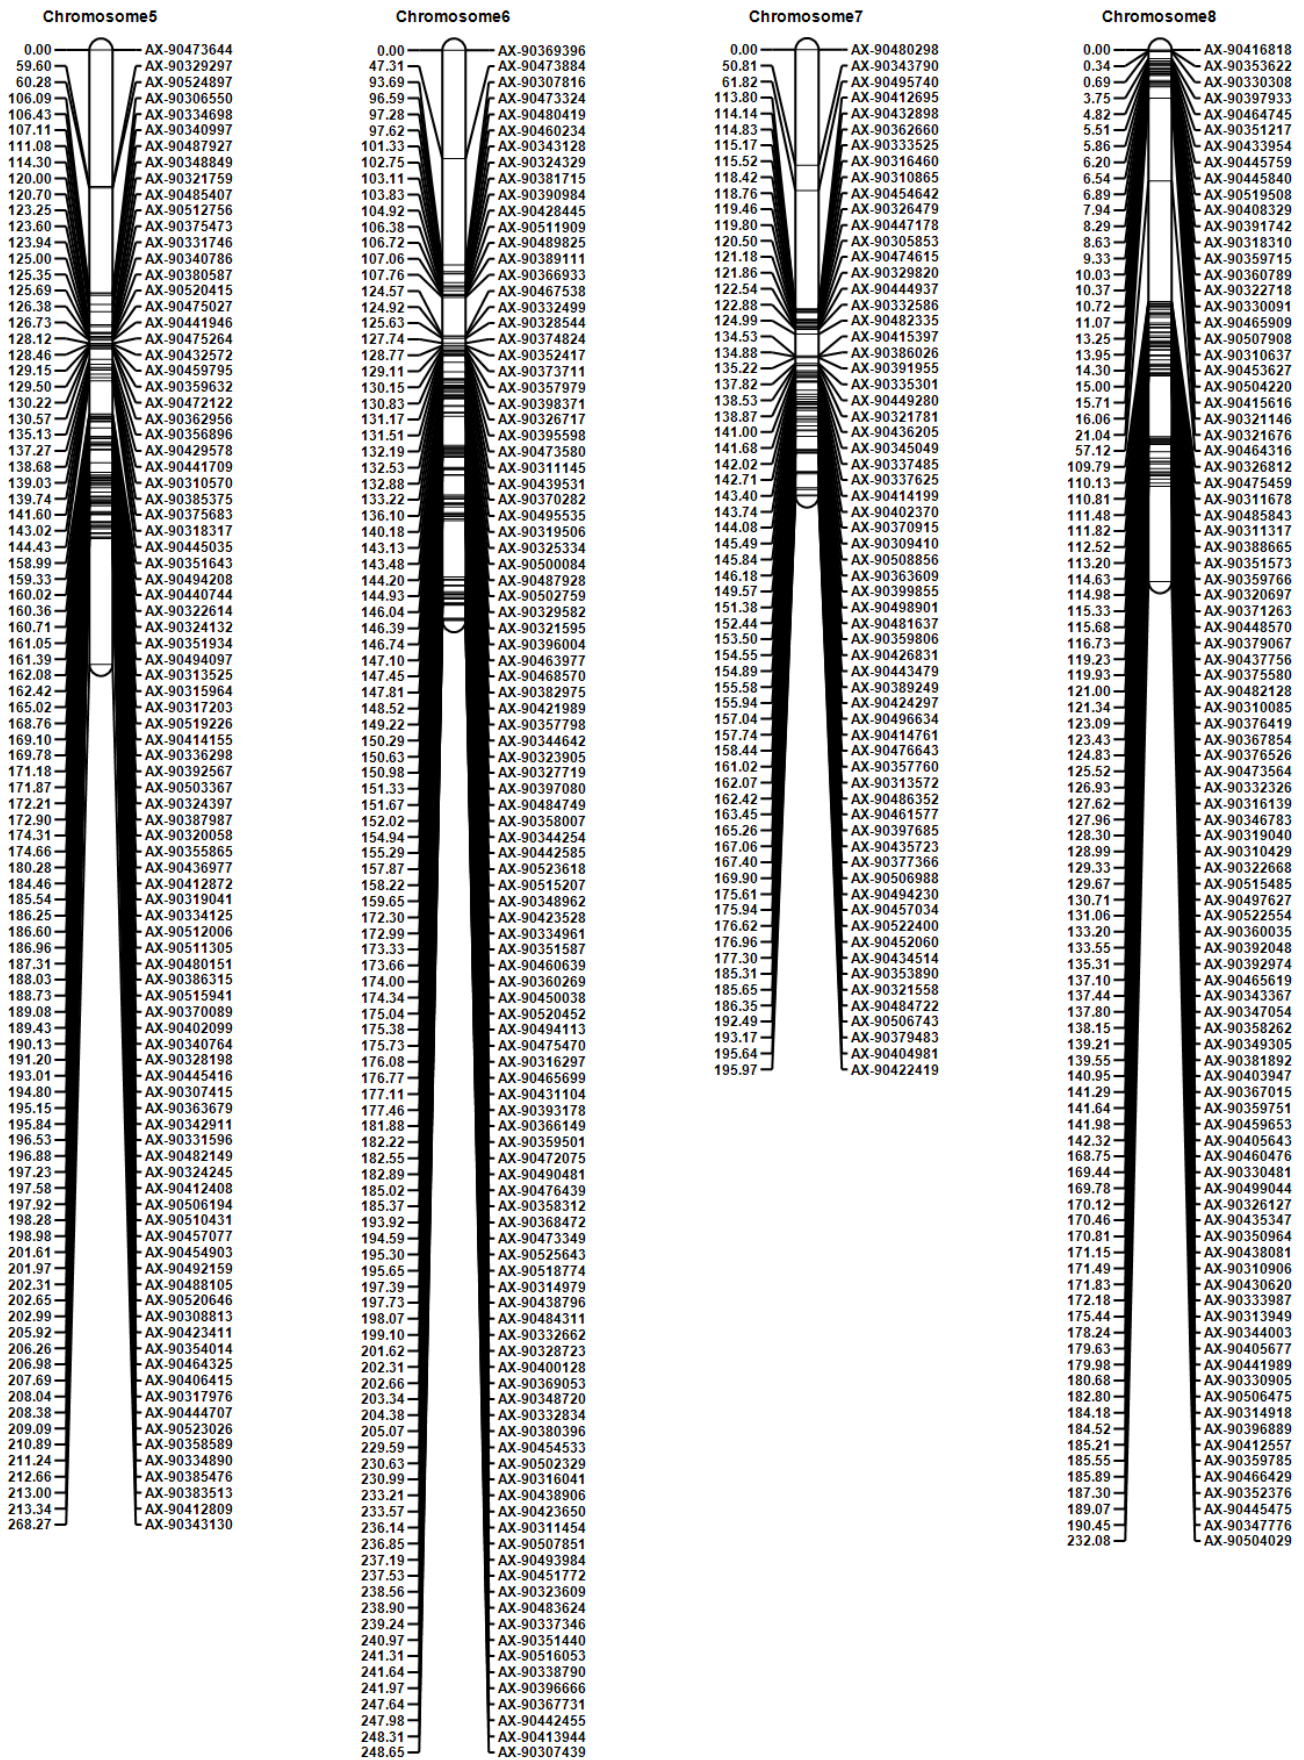



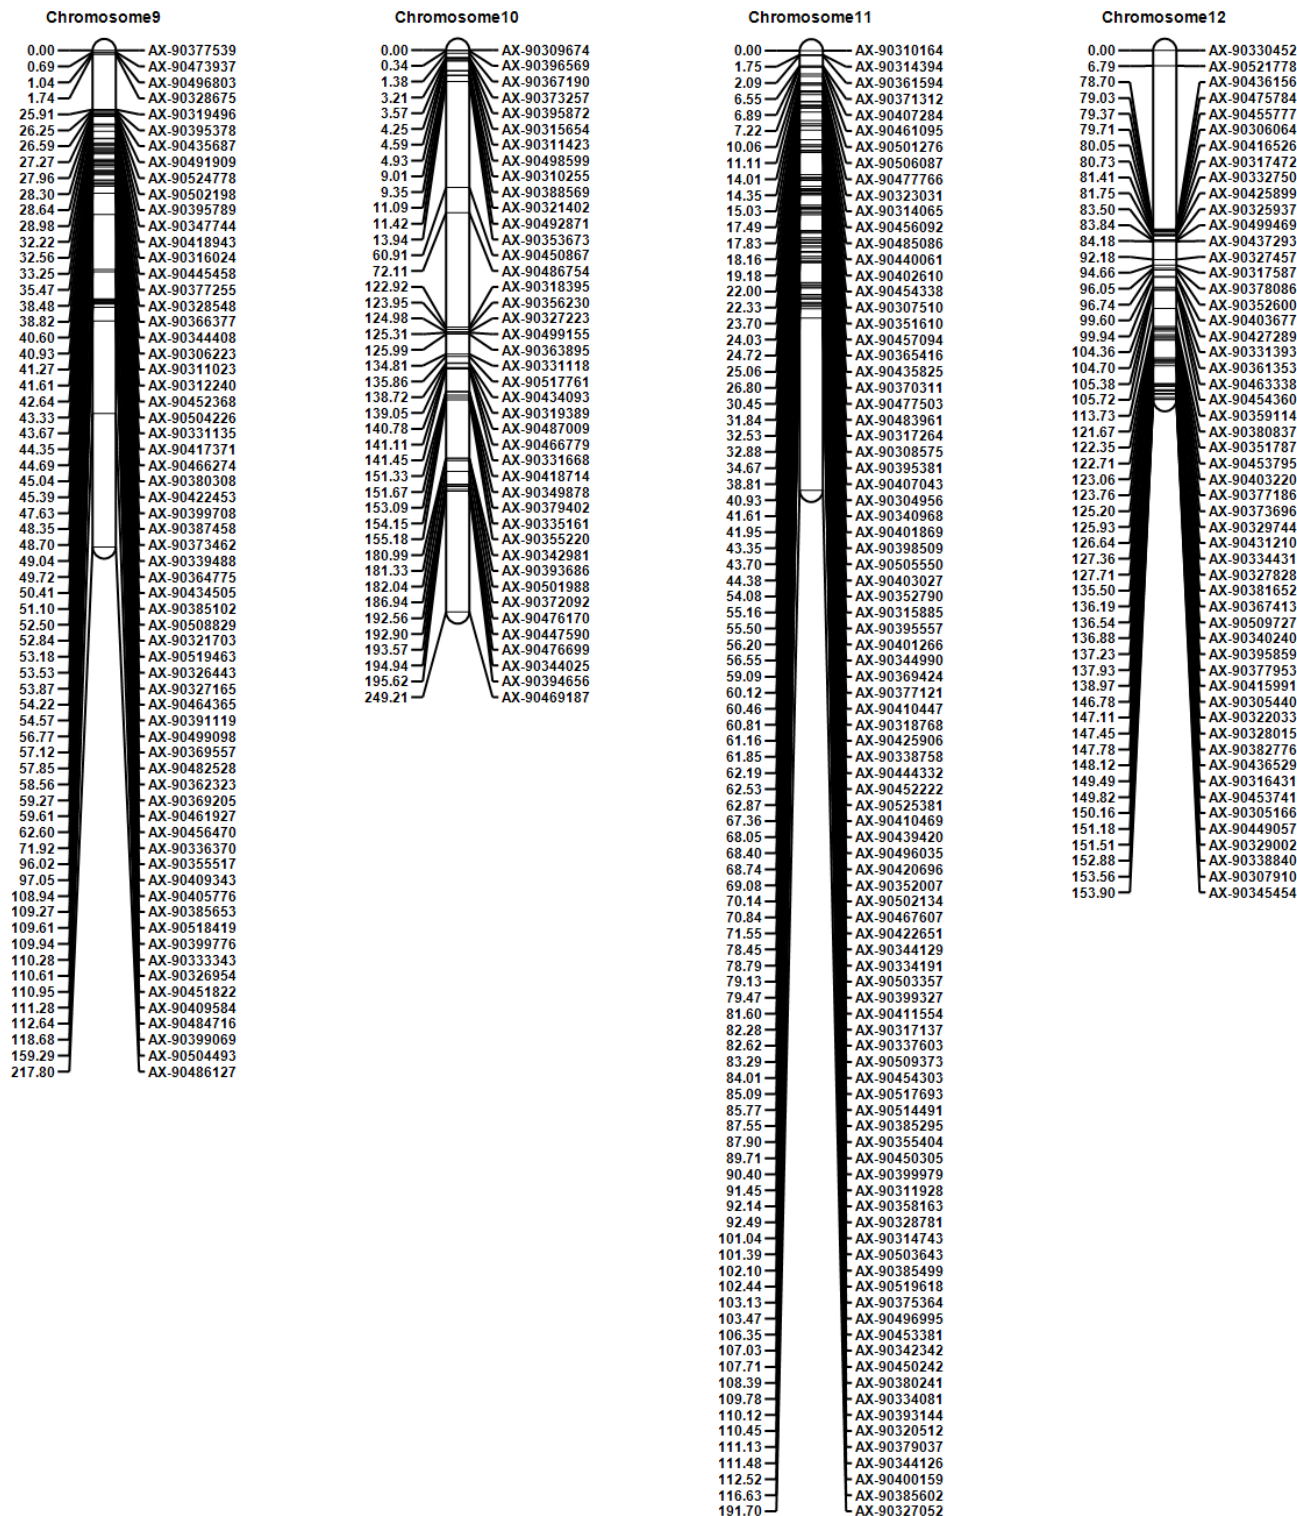

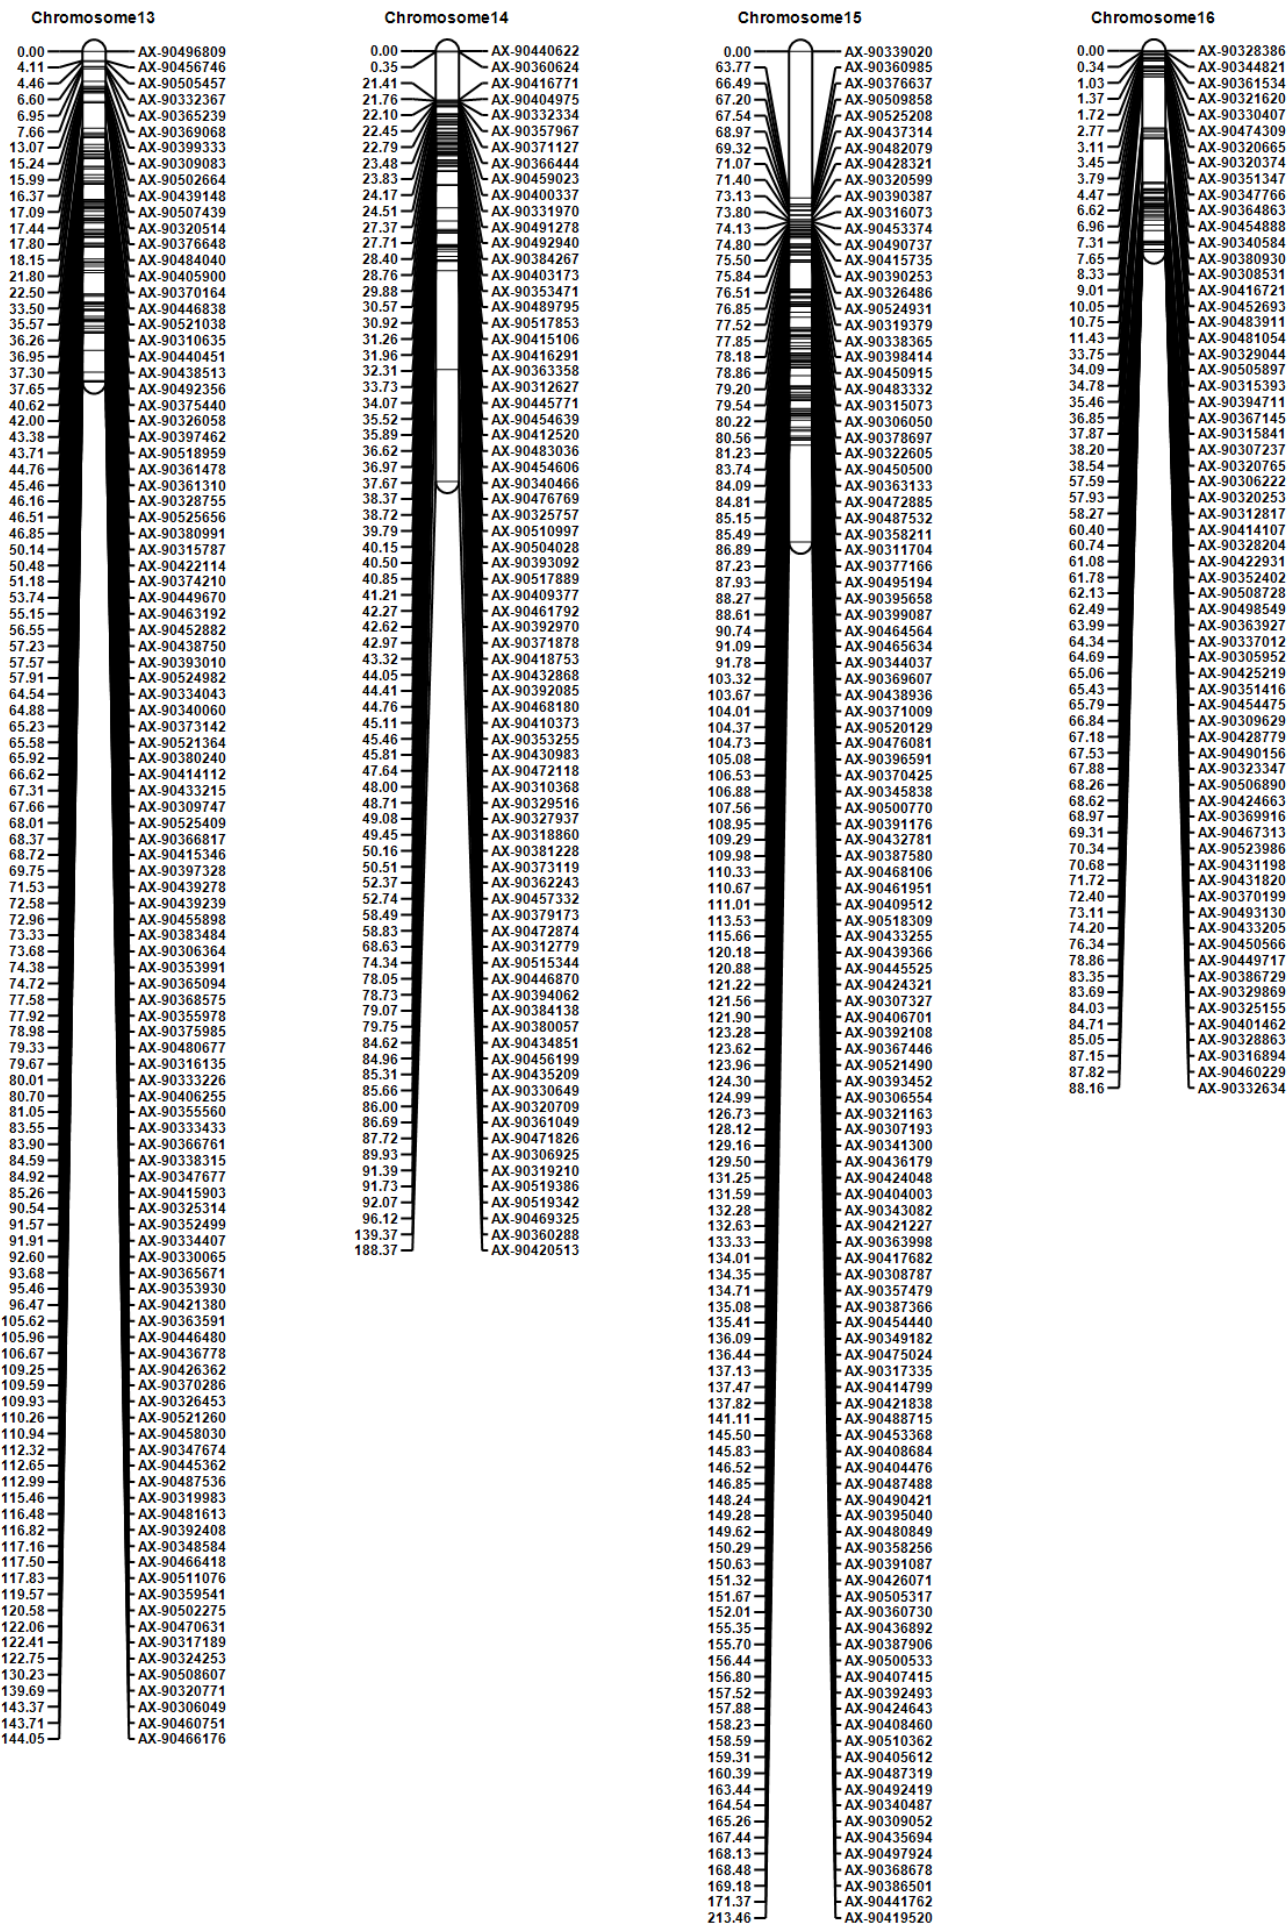



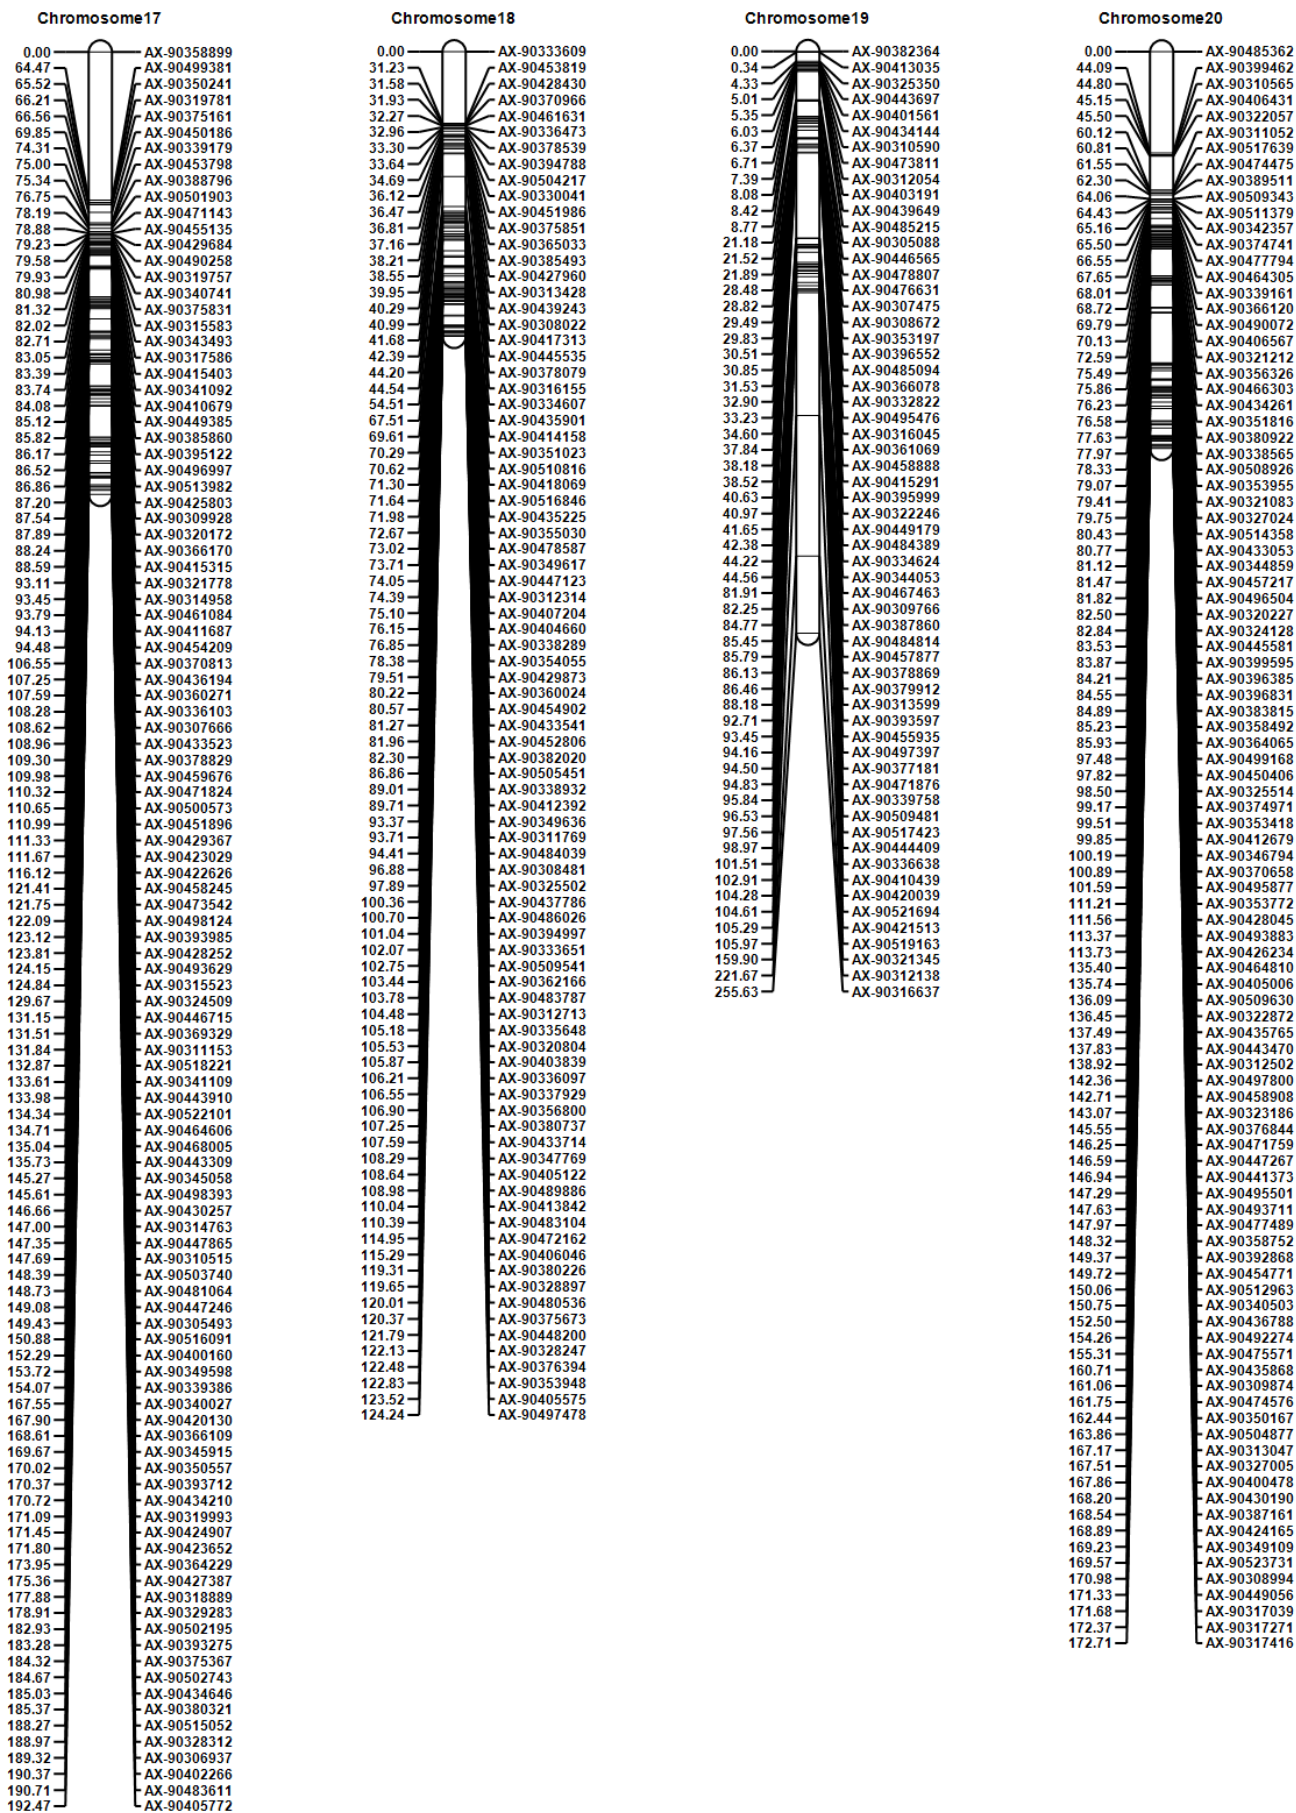

Supplement: s1 [file s1]
