# Supplementary material for: Identification of QTL for Tolerance to Flooding Stress at Seedling Stage of Soybean (Glycine max L. Merr.)
Source: MDPI journal article supplement (doi:10.3390/agronomy11050908), 2021-05-05
Supplement: s1 [file s1]

Archive with 7 entries (7 files):
- Supplementary files_agronomy-1150316/Supplementary Figure S1.pdf
- Supplementary files_agronomy-1150316/Supplementary Figure S2.pdf
- Supplementary files_agronomy-1150316/Supplementary Figure S3.pdf
- Supplementary files_agronomy-1150316/Supplementary Table S1.pdf
- Supplementary files_agronomy-1150316/Supplementary Table S2.xlsx
- Supplementary files_agronomy-1150316/Supplementary Table S3.pdf
- Supplementary files_agronomy-1150316/Supplementary Table S4.xlsx
