# Supplementary material for: Identification of QTL for Tolerance to Flooding Stress at Seedling Stage of Soybean (Glycine max L. Merr.)
Source: MDPI journal article supplement (doi:10.3390/agronomy11050908), 2021-05-05

**Article title:** Identification of QTL for tolerance to flooding stress at seedling stage of soybean (*Glycine max* L. Merr.)

**Journal name:** Agronomy

**Authors name:** Sanjeev K. Dhungana, Hong-Sik Kim\*, Beom-Kyu Kang, Jeong-Hyun Seo, Hyun-Tae Kim, Sang-Ouk Shin, Jae-Hyeon Oh and In-Yeol Baek

**Email address of corresponding author:** [kimhongs@korea.kr](mailto:kimhongs@korea.kr)

**Supplementary Figure S2.** WinQTL Cartographer plots showing the QTL identified on seven chromosomes (3, 4, 6, 7, 13, 15, and 16) by composite interval mapping with a minimum of 20 cM between QTL and 2-LOD-drop interval. The genetic position (cM) is shown on X-axis and LOD value is shown on Y-axis. The name of a chromosome is mentioned below the genetic position of chromosomes. The dotted areas pointed with green arrow indicate the QTL positions on chromosomes. The name, genetic position, and physical position of QTL are also shown next to the green arrow.

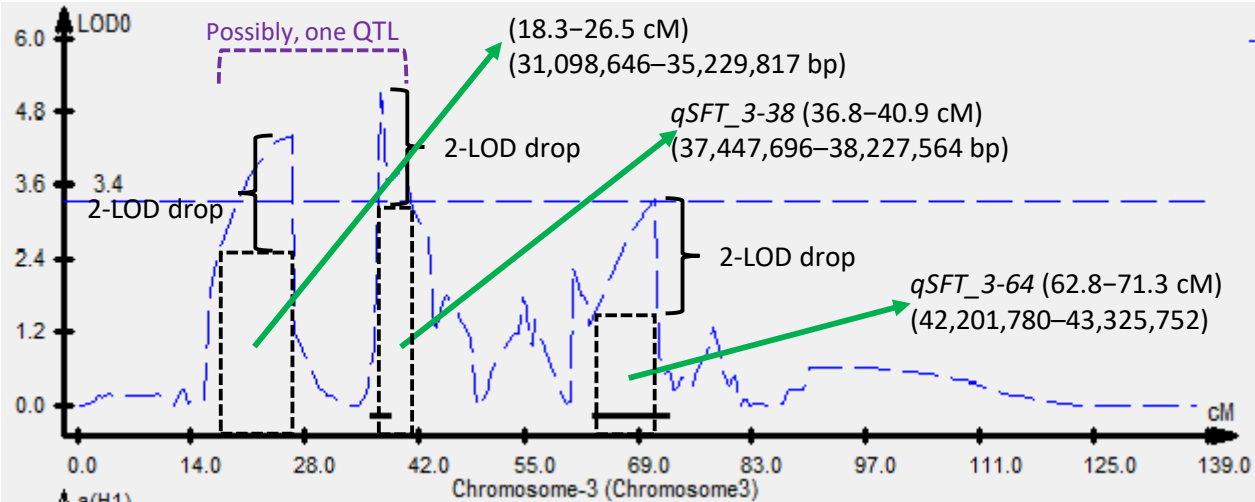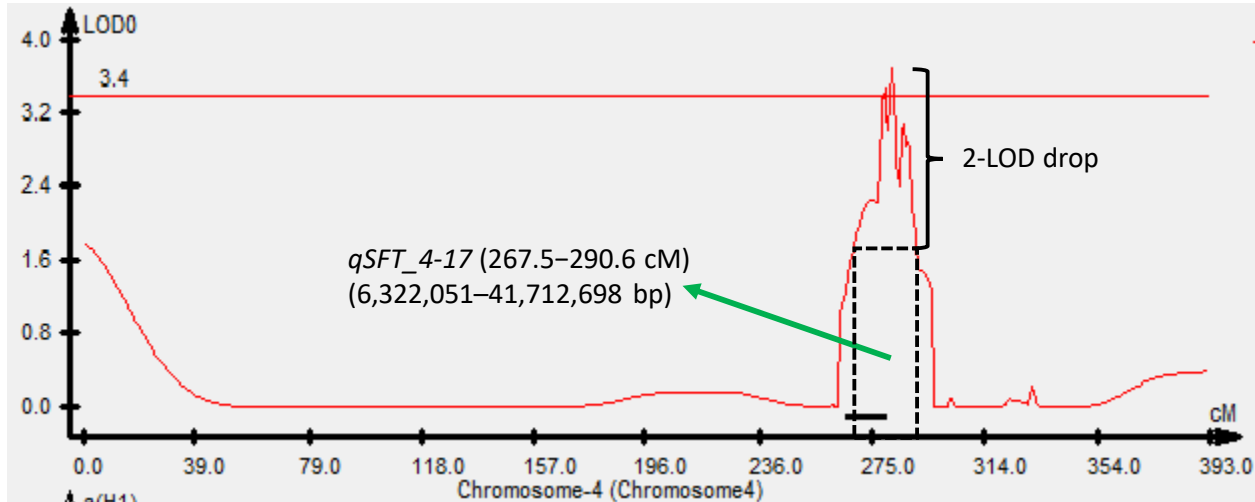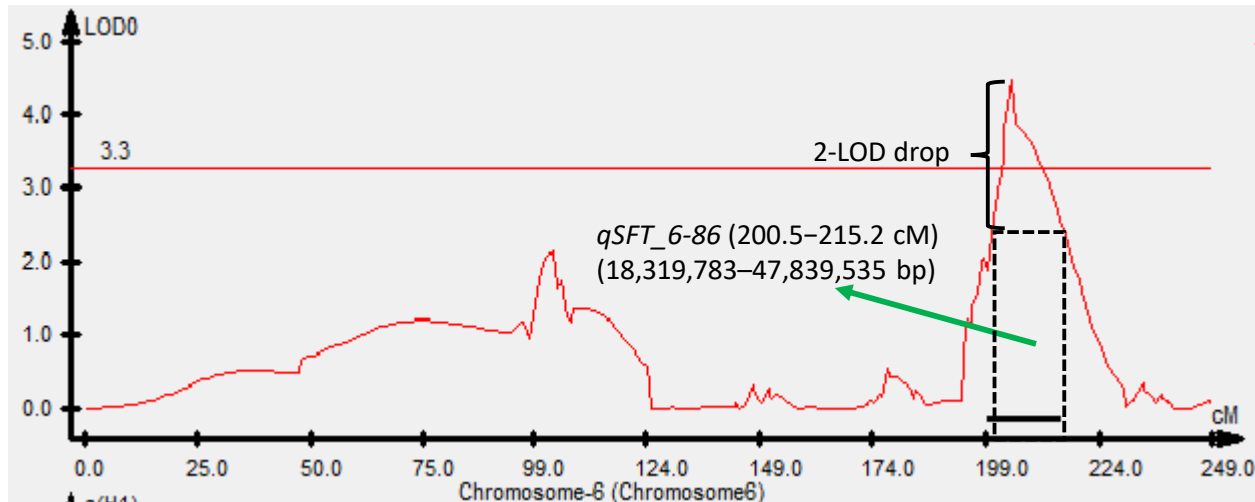

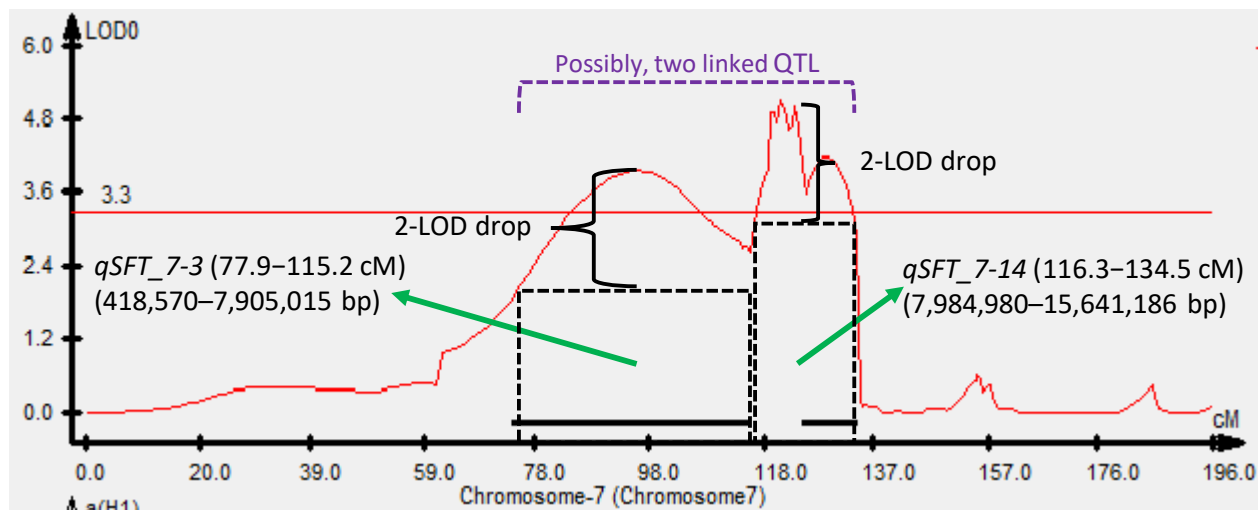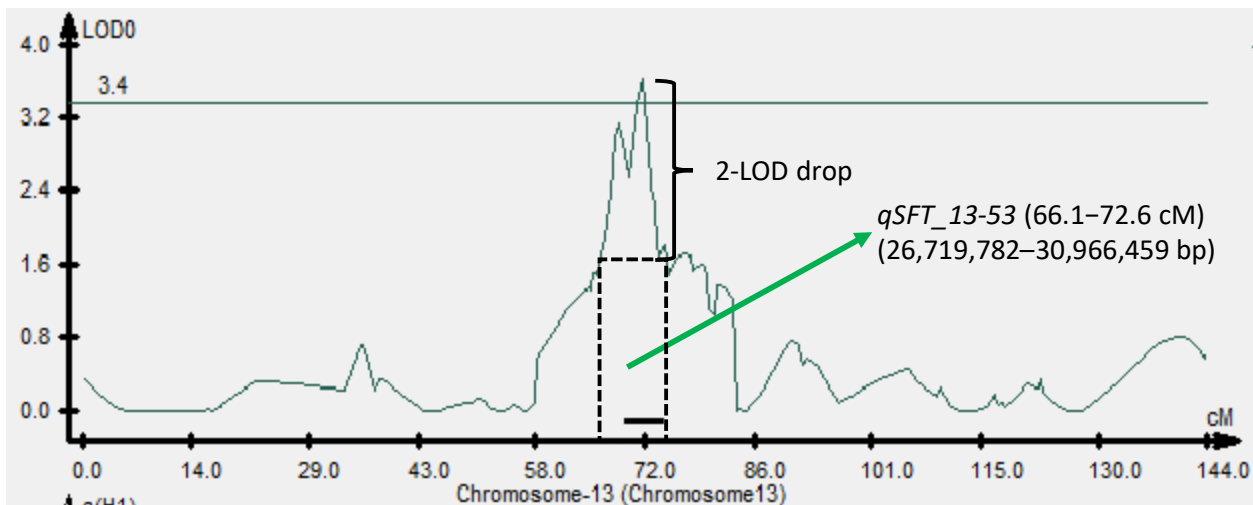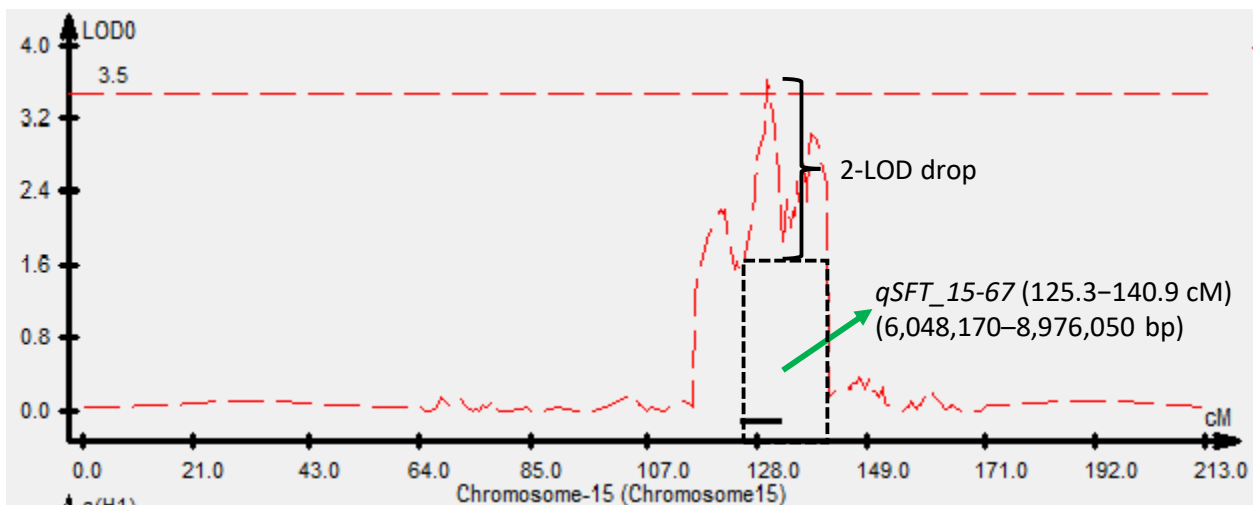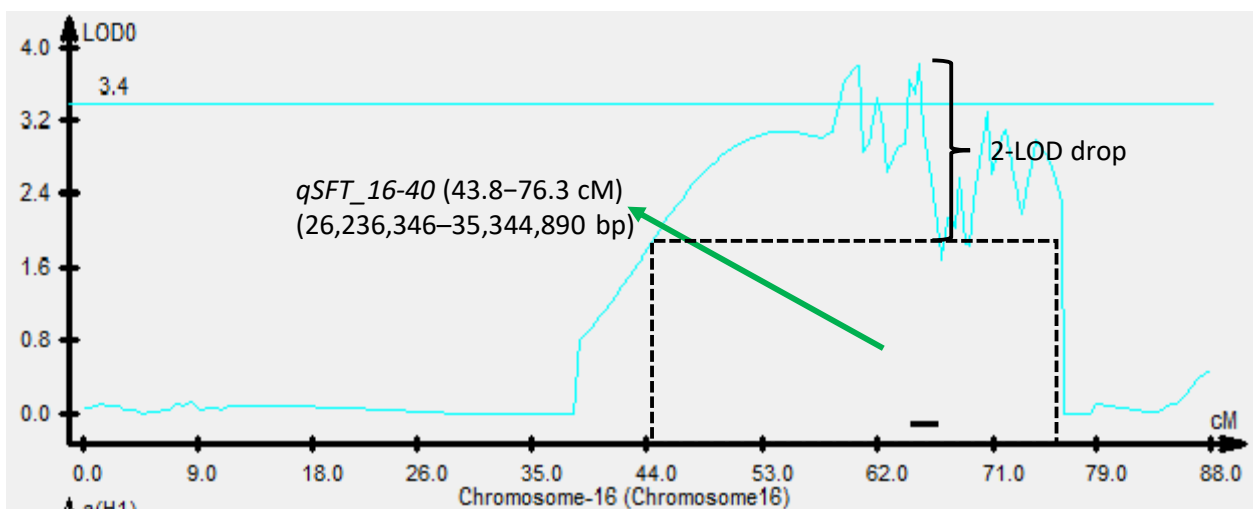

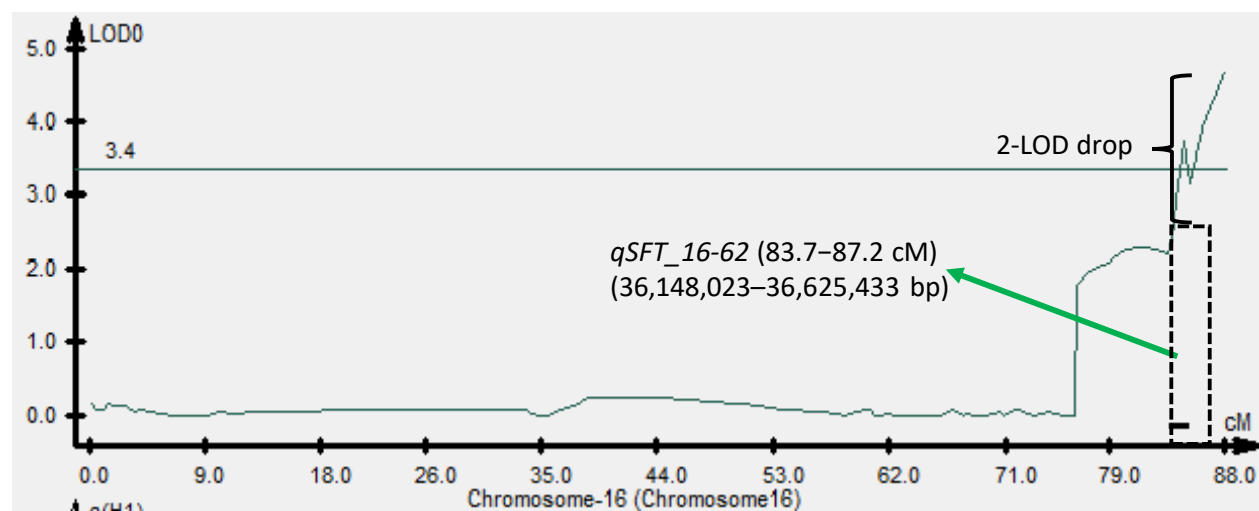

Supplement: s1 [file s1 › Supplementary files_agronomy-1150316/Supplementary Figure S2.pdf]
