# Supplementary material for: Identification of QTL for Tolerance to Flooding Stress at Seedling Stage of Soybean (Glycine max L. Merr.)
Source: MDPI journal article supplement (doi:10.3390/agronomy11050908), 2021-05-05
Supplement: s1 [file s1 › Supplementary files_agronomy-1150316/Supplementary Table S2.xlsx]

## Sheet: Supplementary Table S2
Article title: Identification of QTL for tolerance to flooding stress at seedling stage of soybean (Glycine max L. Merr.)
Journal name: Agronomy
Authors name: Sanjeev K. Dhungana, Hong-Sik Kim*, Beom-Kyu Kang, Jeong-Hyun Seo, Hyun-Tae Kim, Sang-Ouk Shin, Jae-Hyeon Oh and In-Yeol Baek
Email address of corresponding author: kimhongs@korea.kr
Supplementary Table S2. Redundant SNP markers removed by the Bin function of ICI mapping.
SN	MarkerName	AnchorInfo	BinID
1	AX-90306683	1	-1
2	AX-90309755	1	-1
3	AX-90312959	1	-1
4	AX-90316353	1	-1
5	AX-90316763	1	-1
6	AX-90316965	1	-1
7	AX-90324530	1	-1
8	AX-90325355	1	-1
9	AX-90325483	1	-1
10	AX-90332057	1	-1
11	AX-90332156	1	-1
12	AX-90332664	1	-1
13	AX-90333645	1	-1
14	AX-90336494	1	-1
15	AX-90336635	1	-1
16	AX-90337924	1	-1
17	AX-90339317	1	-1
18	AX-90339460	1	-1
19	AX-90341425	1	-1
20	AX-90343954	1	-1
21	AX-90348253	1	-1
22	AX-90348985	1	-1
23	AX-90350078	1	-1
24	AX-90351721	1	-1
25	AX-90353269	1	-1
26	AX-90354945	1	-1
27	AX-90355187	1	-1
28	AX-90357259	1	-1
29	AX-90361182	1	-1
30	AX-90361536	1	-1
31	AX-90362212	1	-1
32	AX-90365471	1	-1
33	AX-90365989	1	-1
34	AX-90368396	1	-1
35	AX-90372984	1	-1
36	AX-90375578	1	-1
37	AX-90378396	1	-1
38	AX-90379015	1	-1
39	AX-90379489	1	-1
40	AX-90386465	1	-1
41	AX-90387766	1	-1
42	AX-90388350	1	-1
43	AX-90388977	1	-1
44	AX-90392310	1	-1
45	AX-90392644	1	-1
46	AX-90393388	1	-1
47	AX-90395574	1	-1
48	AX-90398184	1	-1
49	AX-90398921	1	-1
50	AX-90402557	1	-1
51	AX-90404733	1	-1
52	AX-90406381	1	-1
53	AX-90408827	1	-1
54	AX-90409161	1	-1
55	AX-90409648	1	-1
56	AX-90409825	1	-1
57	AX-90410046	1	-1
58	AX-90410636	1	-1
59	AX-90411936	1	-1
60	AX-90412686	1	-1
61	AX-90415659	1	-1
62	AX-90418155	1	-1
63	AX-90418932	1	-1
64	AX-90420725	1	-1
65	AX-90421413	1	-1
66	AX-90422035	1	-1
67	AX-90422226	1	-1
68	AX-90424278	1	-1
69	AX-90424552	1	-1
70	AX-90429878	1	-1
71	AX-90431377	1	-1
72	AX-90431487	1	-1
73	AX-90431581	1	-1
74	AX-90431707	1	-1
75	AX-90433004	1	-1
76	AX-90434364	1	-1
77	AX-90434436	1	-1
78	AX-90440096	1	-1
79	AX-90445528	1	-1
80	AX-90445697	1	-1
81	AX-90447012	1	-1
82	AX-90447527	1	-1
83	AX-90447537	1	-1
84	AX-90448305	1	-1
85	AX-90448594	1	-1
86	AX-90448770	1	-1
87	AX-90453318	1	-1
88	AX-90454439	1	-1
89	AX-90454716	1	-1
90	AX-90456702	1	-1
91	AX-90456861	1	-1
92	AX-90457085	1	-1
93	AX-90458728	1	-1
94	AX-90460534	1	-1
95	AX-90462147	1	-1
96	AX-90463295	1	-1
97	AX-90464024	1	-1
98	AX-90465172	1	-1
99	AX-90469474	1	-1
100	AX-90473689	1	-1
101	AX-90479331	1	-1
102	AX-90480234	1	-1
103	AX-90480443	1	-1
104	AX-90481611	1	-1
105	AX-90482166	1	-1
106	AX-90483456	1	-1
107	AX-90483835	1	-1
108	AX-90484229	1	-1
109	AX-90485597	1	-1
110	AX-90486543	1	-1
111	AX-90488444	1	-1
112	AX-90488801	1	-1
113	AX-90488875	1	-1
114	AX-90492478	1	-1
115	AX-90496702	1	-1
116	AX-90498622	1	-1
117	AX-90499122	1	-1
118	AX-90500074	1	-1
119	AX-90503091	1	-1
120	AX-90503177	1	-1
121	AX-90508170	1	-1
122	AX-90512544	1	-1
123	AX-90514963	1	-1
124	AX-90515773	1	-1
125	AX-90521628	1	-1
126	AX-90523784	1	-1
127	AX-90305324	2	-1
128	AX-90305551	2	-1
129	AX-90306033	2	-1
130	AX-90306082	2	-1
131	AX-90307092	2	-1
132	AX-90307333	2	-1
133	AX-90307373	2	-1
134	AX-90309345	2	-1
135	AX-90309433	2	-1
136	AX-90309507	2	-1
137	AX-90310264	2	-1
138	AX-90315190	2	-1
139	AX-90316288	2	-1
140	AX-90316862	2	-1
141	AX-90317510	2	-1
142	AX-90322444	2	-1
143	AX-90322825	2	-1
144	AX-90323167	2	-1
145	AX-90324413	2	-1
146	AX-90329488	2	-1
147	AX-90331478	2	-1
148	AX-90332596	2	-1
149	AX-90333912	2	-1
150	AX-90336173	2	-1
151	AX-90336410	2	-1
152	AX-90338096	2	-1
153	AX-90340824	2	-1
154	AX-90340875	2	-1
155	AX-90341071	2	-1
156	AX-90341524	2	-1
157	AX-90341560	2	-1
158	AX-90344299	2	-1
159	AX-90345885	2	-1
160	AX-90347360	2	-1
161	AX-90348274	2	-1
162	AX-90348327	2	-1
163	AX-90349879	2	-1
164	AX-90352134	2	-1
165	AX-90355140	2	-1
166	AX-90355338	2	-1
167	AX-90357179	2	-1
168	AX-90357671	2	-1
169	AX-90359033	2	-1
170	AX-90361913	2	-1
171	AX-90368180	2	-1
172	AX-90368740	2	-1
173	AX-90372830	2	-1
174	AX-90373593	2	-1
175	AX-90374337	2	-1
176	AX-90375076	2	-1
177	AX-90376483	2	-1
178	AX-90378943	2	-1
179	AX-90380576	2	-1
180	AX-90382520	2	-1
181	AX-90383501	2	-1
182	AX-90385954	2	-1
183	AX-90387103	2	-1
184	AX-90388747	2	-1
185	AX-90391121	2	-1
186	AX-90392893	2	-1
187	AX-90393312	2	-1
188	AX-90393981	2	-1
189	AX-90396541	2	-1
190	AX-90397073	2	-1
191	AX-90400996	2	-1
192	AX-90403112	2	-1
193	AX-90403829	2	-1
194	AX-90404069	2	-1
195	AX-90405591	2	-1
196	AX-90408513	2	-1
197	AX-90409055	2	-1
198	AX-90410146	2	-1
199	AX-90410398	2	-1
200	AX-90412871	2	-1
201	AX-90413410	2	-1
202	AX-90413514	2	-1
203	AX-90419066	2	-1
204	AX-90423182	2	-1
205	AX-90425685	2	-1
206	AX-90427650	2	-1
207	AX-90428872	2	-1
208	AX-90434286	2	-1
209	AX-90435731	2	-1
210	AX-90435920	2	-1
211	AX-90439186	2	-1
212	AX-90442209	2	-1
213	AX-90448673	2	-1
214	AX-90452302	2	-1
215	AX-90452436	2	-1
216	AX-90453793	2	-1
217	AX-90454433	2	-1
218	AX-90455015	2	-1
219	AX-90457423	2	-1
220	AX-90458566	2	-1
221	AX-90459666	2	-1
222	AX-90461508	2	-1
223	AX-90463160	2	-1
224	AX-90468926	2	-1
225	AX-90468974	2	-1
226	AX-90469811	2	-1
227	AX-90470295	2	-1
228	AX-90470434	2	-1
229	AX-90476325	2	-1
230	AX-90478450	2	-1
231	AX-90483580	2	-1
232	AX-90484591	2	-1
233	AX-90487001	2	-1
234	AX-90488926	2	-1
235	AX-90490051	2	-1
236	AX-90494919	2	-1
237	AX-90495042	2	-1
238	AX-90496051	2	-1
239	AX-90496967	2	-1
240	AX-90498771	2	-1
241	AX-90499753	2	-1
242	AX-90502136	2	-1
243	AX-90505017	2	-1
244	AX-90505075	2	-1
245	AX-90505408	2	-1
246	AX-90507384	2	-1
247	AX-90508791	2	-1
248	AX-90510591	2	-1
249	AX-90510613	2	-1
250	AX-90511782	2	-1
251	AX-90514777	2	-1
252	AX-90517856	2	-1
253	AX-90519098	2	-1
254	AX-90519492	2	-1
255	AX-90519946	2	-1
256	AX-90520711	2	-1
257	AX-90521896	2	-1
258	AX-90522020	2	-1
259	AX-90522133	2	-1
260	AX-90525668	2	-1
261	AX-90306433	3	-1
262	AX-90306896	3	-1
263	AX-90307757	3	-1
264	AX-90311120	3	-1
265	AX-90311327	3	-1
266	AX-90319507	3	-1
267	AX-90319623	3	-1
268	AX-90320146	3	-1
269	AX-90320612	3	-1
270	AX-90321646	3	-1
271	AX-90321855	3	-1
272	AX-90323416	3	-1
273	AX-90325204	3	-1
274	AX-90330787	3	-1
275	AX-90332126	3	-1
276	AX-90335471	3	-1
277	AX-90336325	3	-1
278	AX-90337907	3	-1
279	AX-90342280	3	-1
280	AX-90342890	3	-1
281	AX-90344243	3	-1
282	AX-90345827	3	-1
283	AX-90349732	3	-1
284	AX-90351243	3	-1
285	AX-90352359	3	-1
286	AX-90352611	3	-1
287	AX-90355682	3	-1
288	AX-90356883	3	-1
289	AX-90360047	3	-1
290	AX-90361611	3	-1
291	AX-90361724	3	-1
292	AX-90362051	3	-1
293	AX-90364015	3	-1
294	AX-90364329	3	-1
295	AX-90367366	3	-1
296	AX-90367684	3	-1
297	AX-90378557	3	-1
298	AX-90379562	3	-1
299	AX-90382331	3	-1
300	AX-90385195	3	-1
301	AX-90388004	3	-1
302	AX-90392828	3	-1
303	AX-90393191	3	-1
304	AX-90395498	3	-1
305	AX-90396379	3	-1
306	AX-90398421	3	-1
307	AX-90402238	3	-1
308	AX-90403881	3	-1
309	AX-90404269	3	-1
310	AX-90410433	3	-1
311	AX-90411919	3	-1
312	AX-90417905	3	-1
313	AX-90418674	3	-1
314	AX-90418934	3	-1
315	AX-90419464	3	-1
316	AX-90419470	3	-1
317	AX-90422629	3	-1
318	AX-90423637	3	-1
319	AX-90426270	3	-1
320	AX-90427292	3	-1
321	AX-90427659	3	-1
322	AX-90430209	3	-1
323	AX-90431425	3	-1
324	AX-90434264	3	-1
325	AX-90439159	3	-1
326	AX-90440441	3	-1
327	AX-90441259	3	-1
328	AX-90442300	3	-1
329	AX-90442411	3	-1
330	AX-90443366	3	-1
331	AX-90444842	3	-1
332	AX-90444895	3	-1
333	AX-90446768	3	-1
334	AX-90446770	3	-1
335	AX-90450523	3	-1
336	AX-90455767	3	-1
337	AX-90461943	3	-1
338	AX-90463240	3	-1
339	AX-90464579	3	-1
340	AX-90466194	3	-1
341	AX-90467994	3	-1
342	AX-90470004	3	-1
343	AX-90476025	3	-1
344	AX-90480199	3	-1
345	AX-90484382	3	-1
346	AX-90493876	3	-1
347	AX-90498345	3	-1
348	AX-90498529	3	-1
349	AX-90502331	3	-1
350	AX-90502632	3	-1
351	AX-90503561	3	-1
352	AX-90504759	3	-1
353	AX-90504876	3	-1
354	AX-90504974	3	-1
355	AX-90509074	3	-1
356	AX-90509609	3	-1
357	AX-90511736	3	-1
358	AX-90512262	3	-1
359	AX-90516446	3	-1
360	AX-90518157	3	-1
361	AX-90518931	3	-1
362	AX-90519747	3	-1
363	AX-90520379	3	-1
364	AX-90522668	3	-1
365	AX-90522922	3	-1
366	AX-90524347	3	-1
367	AX-90524824	3	-1
368	AX-90307614	4	-1
369	AX-90308325	4	-1
370	AX-90313045	4	-1
371	AX-90314470	4	-1
372	AX-90315262	4	-1
373	AX-90316656	4	-1
374	AX-90318275	4	-1
375	AX-90323181	4	-1
376	AX-90325142	4	-1
377	AX-90326231	4	-1
378	AX-90326944	4	-1
379	AX-90334785	4	-1
380	AX-90335162	4	-1
381	AX-90335703	4	-1
382	AX-90338742	4	-1
383	AX-90340932	4	-1
384	AX-90342646	4	-1
385	AX-90349025	4	-1
386	AX-90349183	4	-1
387	AX-90349358	4	-1
388	AX-90358184	4	-1
389	AX-90359413	4	-1
390	AX-90359648	4	-1
391	AX-90362137	4	-1
392	AX-90373680	4	-1
393	AX-90374150	4	-1
394	AX-90375101	4	-1
395	AX-90379857	4	-1
396	AX-90381322	4	-1
397	AX-90383944	4	-1
398	AX-90387759	4	-1
399	AX-90388868	4	-1
400	AX-90390938	4	-1
401	AX-90393131	4	-1
402	AX-90396628	4	-1
403	AX-90402030	4	-1
404	AX-90404761	4	-1
405	AX-90412799	4	-1
406	AX-90415265	4	-1
407	AX-90417311	4	-1
408	AX-90426351	4	-1
409	AX-90427423	4	-1
410	AX-90431247	4	-1
411	AX-90433782	4	-1
412	AX-90434981	4	-1
413	AX-90441935	4	-1
414	AX-90442513	4	-1
415	AX-90443813	4	-1
416	AX-90445630	4	-1
417	AX-90446943	4	-1
418	AX-90447350	4	-1
419	AX-90448213	4	-1
420	AX-90448756	4	-1
421	AX-90448942	4	-1
422	AX-90452133	4	-1
423	AX-90452417	4	-1
424	AX-90452958	4	-1
425	AX-90453422	4	-1
426	AX-90457102	4	-1
427	AX-90462344	4	-1
428	AX-90463472	4	-1
429	AX-90466252	4	-1
430	AX-90470692	4	-1
431	AX-90475698	4	-1
432	AX-90480239	4	-1
433	AX-90482089	4	-1
434	AX-90482153	4	-1
435	AX-90487976	4	-1
436	AX-90488880	4	-1
437	AX-90494794	4	-1
438	AX-90494962	4	-1
439	AX-90495392	4	-1
440	AX-90497347	4	-1
441	AX-90500088	4	-1
442	AX-90502563	4	-1
443	AX-90510008	4	-1
444	AX-90512358	4	-1
445	AX-90513446	4	-1
446	AX-90514781	4	-1
447	AX-90514921	4	-1
448	AX-90517460	4	-1
449	AX-90521278	4	-1
450	AX-90523621	4	-1
451	AX-90308738	5	-1
452	AX-90309560	5	-1
453	AX-90317939	5	-1
454	AX-90318224	5	-1
455	AX-90318574	5	-1
456	AX-90319352	5	-1
457	AX-90329760	5	-1
458	AX-90334111	5	-1
459	AX-90337020	5	-1
460	AX-90340197	5	-1
461	AX-90341681	5	-1
462	AX-90341814	5	-1
463	AX-90344423	5	-1
464	AX-90350307	5	-1
465	AX-90350572	5	-1
466	AX-90357884	5	-1
467	AX-90357930	5	-1
468	AX-90362342	5	-1
469	AX-90362905	5	-1
470	AX-90363777	5	-1
471	AX-90366655	5	-1
472	AX-90366902	5	-1
473	AX-90367281	5	-1
474	AX-90369810	5	-1
475	AX-90370249	5	-1
476	AX-90372352	5	-1
477	AX-90373219	5	-1
478	AX-90376707	5	-1
479	AX-90376874	5	-1
480	AX-90380817	5	-1
481	AX-90384576	5	-1
482	AX-90384761	5	-1
483	AX-90387257	5	-1
484	AX-90388558	5	-1
485	AX-90390128	5	-1
486	AX-90396428	5	-1
487	AX-90396861	5	-1
488	AX-90397560	5	-1
489	AX-90403007	5	-1
490	AX-90403937	5	-1
491	AX-90404359	5	-1
492	AX-90406358	5	-1
493	AX-90406587	5	-1
494	AX-90407705	5	-1
495	AX-90409198	5	-1
496	AX-90410261	5	-1
497	AX-90412197	5	-1
498	AX-90416945	5	-1
499	AX-90422691	5	-1
500	AX-90422984	5	-1
501	AX-90423243	5	-1
502	AX-90423627	5	-1
503	AX-90428619	5	-1
504	AX-90429031	5	-1
505	AX-90431436	5	-1
506	AX-90433383	5	-1
507	AX-90441689	5	-1
508	AX-90442498	5	-1
509	AX-90446951	5	-1
510	AX-90449712	5	-1
511	AX-90454641	5	-1
512	AX-90458968	5	-1
513	AX-90464001	5	-1
514	AX-90465591	5	-1
515	AX-90466933	5	-1
516	AX-90467753	5	-1
517	AX-90468905	5	-1
518	AX-90469422	5	-1
519	AX-90471562	5	-1
520	AX-90472336	5	-1
521	AX-90473517	5	-1
522	AX-90485882	5	-1
523	AX-90487834	5	-1
524	AX-90492353	5	-1
525	AX-90494256	5	-1
526	AX-90496360	5	-1
527	AX-90497645	5	-1
528	AX-90500075	5	-1
529	AX-90504973	5	-1
530	AX-90509096	5	-1
531	AX-90510530	5	-1
532	AX-90518756	5	-1
533	AX-90521809	5	-1
534	AX-90522227	5	-1
535	AX-90522807	5	-1
536	AX-90523042	5	-1
537	AX-90307441	6	-1
538	AX-90307573	6	-1
539	AX-90307710	6	-1
540	AX-90308933	6	-1
541	AX-90311004	6	-1
542	AX-90312172	6	-1
543	AX-90312636	6	-1
544	AX-90313823	6	-1
545	AX-90314197	6	-1
546	AX-90314632	6	-1
547	AX-90315209	6	-1
548	AX-90318385	6	-1
549	AX-90319691	6	-1
550	AX-90321476	6	-1
551	AX-90321863	6	-1
552	AX-90322761	6	-1
553	AX-90322764	6	-1
554	AX-90323137	6	-1
555	AX-90328440	6	-1
556	AX-90328468	6	-1
557	AX-90329829	6	-1
558	AX-90330719	6	-1
559	AX-90332632	6	-1
560	AX-90335717	6	-1
561	AX-90337783	6	-1
562	AX-90339539	6	-1
563	AX-90344067	6	-1
564	AX-90347137	6	-1
565	AX-90347979	6	-1
566	AX-90351915	6	-1
567	AX-90352413	6	-1
568	AX-90352508	6	-1
569	AX-90357090	6	-1
570	AX-90357541	6	-1
571	AX-90358891	6	-1
572	AX-90362164	6	-1
573	AX-90362787	6	-1
574	AX-90362917	6	-1
575	AX-90364172	6	-1
576	AX-90365653	6	-1
577	AX-90365979	6	-1
578	AX-90366036	6	-1
579	AX-90368975	6	-1
580	AX-90370612	6	-1
581	AX-90371378	6	-1
582	AX-90376331	6	-1
583	AX-90378222	6	-1
584	AX-90379491	6	-1
585	AX-90379972	6	-1
586	AX-90381174	6	-1
587	AX-90382110	6	-1
588	AX-90386013	6	-1
589	AX-90386019	6	-1
590	AX-90387259	6	-1
591	AX-90387609	6	-1
592	AX-90388954	6	-1
593	AX-90388979	6	-1
594	AX-90388996	6	-1
595	AX-90389243	6	-1
596	AX-90391472	6	-1
597	AX-90392255	6	-1
598	AX-90394536	6	-1
599	AX-90395014	6	-1
600	AX-90396070	6	-1
601	AX-90396130	6	-1
602	AX-90396618	6	-1
603	AX-90398005	6	-1
604	AX-90405826	6	-1
605	AX-90407175	6	-1
606	AX-90409723	6	-1
607	AX-90409806	6	-1
608	AX-90412875	6	-1
609	AX-90413025	6	-1
610	AX-90413300	6	-1
611	AX-90414573	6	-1
612	AX-90414764	6	-1
613	AX-90418884	6	-1
614	AX-90419774	6	-1
615	AX-90420343	6	-1
616	AX-90423390	6	-1
617	AX-90423883	6	-1
618	AX-90425968	6	-1
619	AX-90426968	6	-1
620	AX-90427761	6	-1
621	AX-90427843	6	-1
622	AX-90428369	6	-1
623	AX-90430759	6	-1
624	AX-90432023	6	-1
625	AX-90432117	6	-1
626	AX-90432942	6	-1
627	AX-90433201	6	-1
628	AX-90434030	6	-1
629	AX-90434294	6	-1
630	AX-90435050	6	-1
631	AX-90437176	6	-1
632	AX-90437788	6	-1
633	AX-90437939	6	-1
634	AX-90438692	6	-1
635	AX-90443351	6	-1
636	AX-90446240	6	-1
637	AX-90447665	6	-1
638	AX-90448726	6	-1
639	AX-90450559	6	-1
640	AX-90451126	6	-1
641	AX-90451925	6	-1
642	AX-90452912	6	-1
643	AX-90453018	6	-1
644	AX-90454758	6	-1
645	AX-90455937	6	-1
646	AX-90456147	6	-1
647	AX-90456757	6	-1
648	AX-90457993	6	-1
649	AX-90459725	6	-1
650	AX-90461506	6	-1
651	AX-90461874	6	-1
652	AX-90462008	6	-1
653	AX-90462445	6	-1
654	AX-90463009	6	-1
655	AX-90463508	6	-1
656	AX-90464225	6	-1
657	AX-90465937	6	-1
658	AX-90466989	6	-1
659	AX-90468559	6	-1
660	AX-90468682	6	-1
661	AX-90469362	6	-1
662	AX-90471868	6	-1
663	AX-90476911	6	-1
664	AX-90478919	6	-1
665	AX-90480719	6	-1
666	AX-90482723	6	-1
667	AX-90483561	6	-1
668	AX-90485445	6	-1
669	AX-90486038	6	-1
670	AX-90486509	6	-1
671	AX-90487387	6	-1
672	AX-90487948	6	-1
673	AX-90490556	6	-1
674	AX-90491098	6	-1
675	AX-90491195	6	-1
676	AX-90492080	6	-1
677	AX-90492401	6	-1
678	AX-90495926	6	-1
679	AX-90497629	6	-1
680	AX-90497931	6	-1
681	AX-90498738	6	-1
682	AX-90499349	6	-1
683	AX-90499356	6	-1
684	AX-90500522	6	-1
685	AX-90500686	6	-1
686	AX-90501065	6	-1
687	AX-90501856	6	-1
688	AX-90502530	6	-1
689	AX-90505013	6	-1
690	AX-90506695	6	-1
691	AX-90508910	6	-1
692	AX-90508948	6	-1
693	AX-90510674	6	-1
694	AX-90515804	6	-1
695	AX-90516774	6	-1
696	AX-90519407	6	-1
697	AX-90520662	6	-1
698	AX-90522071	6	-1
699	AX-90522717	6	-1
700	AX-90522967	6	-1
701	AX-90522981	6	-1
702	AX-90524706	6	-1
703	AX-90312013	7	-1
704	AX-90314383	7	-1
705	AX-90314985	7	-1
706	AX-90315743	7	-1
707	AX-90316829	7	-1
708	AX-90318602	7	-1
709	AX-90322519	7	-1
710	AX-90322644	7	-1
711	AX-90325930	7	-1
712	AX-90325947	7	-1
713	AX-90326181	7	-1
714	AX-90329555	7	-1
715	AX-90331499	7	-1
716	AX-90331710	7	-1
717	AX-90335832	7	-1
718	AX-90337669	7	-1
719	AX-90342313	7	-1
720	AX-90343516	7	-1
721	AX-90346541	7	-1
722	AX-90354661	7	-1
723	AX-90355313	7	-1
724	AX-90355388	7	-1
725	AX-90355552	7	-1
726	AX-90355588	7	-1
727	AX-90356124	7	-1
728	AX-90357785	7	-1
729	AX-90362671	7	-1
730	AX-90363570	7	-1
731	AX-90367265	7	-1
732	AX-90372121	7	-1
733	AX-90374604	7	-1
734	AX-90376152	7	-1
735	AX-90377023	7	-1
736	AX-90378828	7	-1
737	AX-90379918	7	-1
738	AX-90383123	7	-1
739	AX-90385500	7	-1
740	AX-90387748	7	-1
741	AX-90394399	7	-1
742	AX-90402575	7	-1
743	AX-90407037	7	-1
744	AX-90409618	7	-1
745	AX-90410455	7	-1
746	AX-90410990	7	-1
747	AX-90415290	7	-1
748	AX-90417887	7	-1
749	AX-90424493	7	-1
750	AX-90427222	7	-1
751	AX-90430563	7	-1
752	AX-90433771	7	-1
753	AX-90434566	7	-1
754	AX-90434825	7	-1
755	AX-90436764	7	-1
756	AX-90437149	7	-1
757	AX-90438317	7	-1
758	AX-90439919	7	-1
759	AX-90442719	7	-1
760	AX-90443141	7	-1
761	AX-90444530	7	-1
762	AX-90446224	7	-1
763	AX-90446581	7	-1
764	AX-90447010	7	-1
765	AX-90447121	7	-1
766	AX-90447991	7	-1
767	AX-90449157	7	-1
768	AX-90450196	7	-1
769	AX-90450903	7	-1
770	AX-90452489	7	-1
771	AX-90456059	7	-1
772	AX-90462585	7	-1
773	AX-90465187	7	-1
774	AX-90472840	7	-1
775	AX-90474575	7	-1
776	AX-90480009	7	-1
777	AX-90480759	7	-1
778	AX-90485774	7	-1
779	AX-90486354	7	-1
780	AX-90486805	7	-1
781	AX-90488619	7	-1
782	AX-90489738	7	-1
783	AX-90491045	7	-1
784	AX-90492528	7	-1
785	AX-90492639	7	-1
786	AX-90492851	7	-1
787	AX-90493521	7	-1
788	AX-90494201	7	-1
789	AX-90494744	7	-1
790	AX-90498259	7	-1
791	AX-90500795	7	-1
792	AX-90507833	7	-1
793	AX-90508585	7	-1
794	AX-90510154	7	-1
795	AX-90511209	7	-1
796	AX-90512382	7	-1
797	AX-90514962	7	-1
798	AX-90515880	7	-1
799	AX-90519595	7	-1
800	AX-90521226	7	-1
801	AX-90308095	8	-1
802	AX-90308152	8	-1
803	AX-90308392	8	-1
804	AX-90311894	8	-1
805	AX-90313151	8	-1
806	AX-90316253	8	-1
807	AX-90316832	8	-1
808	AX-90318505	8	-1
809	AX-90319570	8	-1
810	AX-90324432	8	-1
811	AX-90327853	8	-1
812	AX-90328103	8	-1
813	AX-90333427	8	-1
814	AX-90334729	8	-1
815	AX-90348739	8	-1
816	AX-90351478	8	-1
817	AX-90370518	8	-1
818	AX-90376656	8	-1
819	AX-90376782	8	-1
820	AX-90385282	8	-1
821	AX-90385880	8	-1
822	AX-90387954	8	-1
823	AX-90388866	8	-1
824	AX-90396671	8	-1
825	AX-90404601	8	-1
826	AX-90406556	8	-1
827	AX-90409554	8	-1
828	AX-90415539	8	-1
829	AX-90416888	8	-1
830	AX-90422285	8	-1
831	AX-90423762	8	-1
832	AX-90426032	8	-1
833	AX-90426112	8	-1
834	AX-90426605	8	-1
835	AX-90427796	8	-1
836	AX-90428690	8	-1
837	AX-90437550	8	-1
838	AX-90439405	8	-1
839	AX-90444045	8	-1
840	AX-90444567	8	-1
841	AX-90447113	8	-1
842	AX-90449307	8	-1
843	AX-90451880	8	-1
844	AX-90452041	8	-1
845	AX-90452586	8	-1
846	AX-90455917	8	-1
847	AX-90466424	8	-1
848	AX-90469538	8	-1
849	AX-90470281	8	-1
850	AX-90474154	8	-1
851	AX-90474726	8	-1
852	AX-90479453	8	-1
853	AX-90479647	8	-1
854	AX-90485092	8	-1
855	AX-90485106	8	-1
856	AX-90487703	8	-1
857	AX-90489878	8	-1
858	AX-90491125	8	-1
859	AX-90493463	8	-1
860	AX-90494791	8	-1
861	AX-90500270	8	-1
862	AX-90503275	8	-1
863	AX-90504178	8	-1
864	AX-90505814	8	-1
865	AX-90507596	8	-1
866	AX-90508441	8	-1
867	AX-90515742	8	-1
868	AX-90517405	8	-1
869	AX-90522249	8	-1
870	AX-90523034	8	-1
871	AX-90524239	8	-1
872	AX-90305733	9	-1
873	AX-90306106	9	-1
874	AX-90308433	9	-1
875	AX-90309218	9	-1
876	AX-90311436	9	-1
877	AX-90317794	9	-1
878	AX-90317815	9	-1
879	AX-90318009	9	-1
880	AX-90318056	9	-1
881	AX-90318284	9	-1
882	AX-90321220	9	-1
883	AX-90324764	9	-1
884	AX-90331672	9	-1
885	AX-90332474	9	-1
886	AX-90333831	9	-1
887	AX-90334427	9	-1
888	AX-90334565	9	-1
889	AX-90338741	9	-1
890	AX-90339457	9	-1
891	AX-90342472	9	-1
892	AX-90342554	9	-1
893	AX-90345711	9	-1
894	AX-90348451	9	-1
895	AX-90348652	9	-1
896	AX-90351848	9	-1
897	AX-90353821	9	-1
898	AX-90355613	9	-1
899	AX-90357231	9	-1
900	AX-90357527	9	-1
901	AX-90357841	9	-1
902	AX-90365100	9	-1
903	AX-90369026	9	-1
904	AX-90371643	9	-1
905	AX-90371715	9	-1
906	AX-90376664	9	-1
907	AX-90379850	9	-1
908	AX-90382491	9	-1
909	AX-90387721	9	-1
910	AX-90388366	9	-1
911	AX-90389405	9	-1
912	AX-90392649	9	-1
913	AX-90393976	9	-1
914	AX-90395336	9	-1
915	AX-90412167	9	-1
916	AX-90412638	9	-1
917	AX-90413990	9	-1
918	AX-90414115	9	-1
919	AX-90418479	9	-1
920	AX-90423293	9	-1
921	AX-90425199	9	-1
922	AX-90425943	9	-1
923	AX-90426927	9	-1
924	AX-90429154	9	-1
925	AX-90434162	9	-1
926	AX-90434337	9	-1
927	AX-90436381	9	-1
928	AX-90439014	9	-1
929	AX-90439821	9	-1
930	AX-90441472	9	-1
931	AX-90443560	9	-1
932	AX-90444404	9	-1
933	AX-90447666	9	-1
934	AX-90448070	9	-1
935	AX-90448264	9	-1
936	AX-90451172	9	-1
937	AX-90453895	9	-1
938	AX-90462536	9	-1
939	AX-90463468	9	-1
940	AX-90470685	9	-1
941	AX-90471293	9	-1
942	AX-90471442	9	-1
943	AX-90475659	9	-1
944	AX-90480655	9	-1
945	AX-90484374	9	-1
946	AX-90486910	9	-1
947	AX-90487060	9	-1
948	AX-90490934	9	-1
949	AX-90492831	9	-1
950	AX-90492909	9	-1
951	AX-90493772	9	-1
952	AX-90494572	9	-1
953	AX-90494606	9	-1
954	AX-90494953	9	-1
955	AX-90496117	9	-1
956	AX-90501400	9	-1
957	AX-90501766	9	-1
958	AX-90502647	9	-1
959	AX-90505414	9	-1
960	AX-90505585	9	-1
961	AX-90511573	9	-1
962	AX-90517756	9	-1
963	AX-90327676	10	-1
964	AX-90339869	10	-1
965	AX-90340104	10	-1
966	AX-90345828	10	-1
967	AX-90352278	10	-1
968	AX-90358016	10	-1
969	AX-90368573	10	-1
970	AX-90368742	10	-1
971	AX-90393101	10	-1
972	AX-90425211	10	-1
973	AX-90429209	10	-1
974	AX-90431955	10	-1
975	AX-90437195	10	-1
976	AX-90439315	10	-1
977	AX-90444068	10	-1
978	AX-90447111	10	-1
979	AX-90449699	10	-1
980	AX-90452003	10	-1
981	AX-90456237	10	-1
982	AX-90462710	10	-1
983	AX-90464176	10	-1
984	AX-90471685	10	-1
985	AX-90475075	10	-1
986	AX-90475833	10	-1
987	AX-90477122	10	-1
988	AX-90486433	10	-1
989	AX-90487485	10	-1
990	AX-90502463	10	-1
991	AX-90502943	10	-1
992	AX-90517452	10	-1
993	AX-90519474	10	-1
994	AX-90305777	11	-1
995	AX-90305902	11	-1
996	AX-90306107	11	-1
997	AX-90310504	11	-1
998	AX-90312426	11	-1
999	AX-90313065	11	-1
1000	AX-90313524	11	-1
1001	AX-90320140	11	-1
1002	AX-90323272	11	-1
1003	AX-90323520	11	-1
1004	AX-90327332	11	-1
1005	AX-90333055	11	-1
1006	AX-90334396	11	-1
1007	AX-90335407	11	-1
1008	AX-90343019	11	-1
1009	AX-90347739	11	-1
1010	AX-90349960	11	-1
1011	AX-90353439	11	-1
1012	AX-90354010	11	-1
1013	AX-90358824	11	-1
1014	AX-90359912	11	-1
1015	AX-90360537	11	-1
1016	AX-90364011	11	-1
1017	AX-90367075	11	-1
1018	AX-90367431	11	-1
1019	AX-90367912	11	-1
1020	AX-90370086	11	-1
1021	AX-90376167	11	-1
1022	AX-90377433	11	-1
1023	AX-90382315	11	-1
1024	AX-90384580	11	-1
1025	AX-90385332	11	-1
1026	AX-90387060	11	-1
1027	AX-90387146	11	-1
1028	AX-90387794	11	-1
1029	AX-90388853	11	-1
1030	AX-90398676	11	-1
1031	AX-90399800	11	-1
1032	AX-90404669	11	-1
1033	AX-90409790	11	-1
1034	AX-90410796	11	-1
1035	AX-90412361	11	-1
1036	AX-90412668	11	-1
1037	AX-90413773	11	-1
1038	AX-90417515	11	-1
1039	AX-90425829	11	-1
1040	AX-90429136	11	-1
1041	AX-90429158	11	-1
1042	AX-90429823	11	-1
1043	AX-90430437	11	-1
1044	AX-90431823	11	-1
1045	AX-90432822	11	-1
1046	AX-90433621	11	-1
1047	AX-90435503	11	-1
1048	AX-90444002	11	-1
1049	AX-90444405	11	-1
1050	AX-90446664	11	-1
1051	AX-90450856	11	-1
1052	AX-90455886	11	-1
1053	AX-90458911	11	-1
1054	AX-90463203	11	-1
1055	AX-90463662	11	-1
1056	AX-90469044	11	-1
1057	AX-90469720	11	-1
1058	AX-90470181	11	-1
1059	AX-90472220	11	-1
1060	AX-90475827	11	-1
1061	AX-90478648	11	-1
1062	AX-90488595	11	-1
1063	AX-90488628	11	-1
1064	AX-90488918	11	-1
1065	AX-90489174	11	-1
1066	AX-90492098	11	-1
1067	AX-90493086	11	-1
1068	AX-90495498	11	-1
1069	AX-90496263	11	-1
1070	AX-90501176	11	-1
1071	AX-90503529	11	-1
1072	AX-90503849	11	-1
1073	AX-90504860	11	-1
1074	AX-90506761	11	-1
1075	AX-90507894	11	-1
1076	AX-90508412	11	-1
1077	AX-90509590	11	-1
1078	AX-90510869	11	-1
1079	AX-90513618	11	-1
1080	AX-90514574	11	-1
1081	AX-90515220	11	-1
1082	AX-90515616	11	-1
1083	AX-90516672	11	-1
1084	AX-90519151	11	-1
1085	AX-90519519	11	-1
1086	AX-90519665	11	-1
1087	AX-90522410	11	-1
1088	AX-90523092	11	-1
1089	AX-90305045	12	-1
1090	AX-90308579	12	-1
1091	AX-90315435	12	-1
1092	AX-90317168	12	-1
1093	AX-90320585	12	-1
1094	AX-90333789	12	-1
1095	AX-90338885	12	-1
1096	AX-90341008	12	-1
1097	AX-90342931	12	-1
1098	AX-90343396	12	-1
1099	AX-90343592	12	-1
1100	AX-90344978	12	-1
1101	AX-90352138	12	-1
1102	AX-90355583	12	-1
1103	AX-90356100	12	-1
1104	AX-90358101	12	-1
1105	AX-90363941	12	-1
1106	AX-90366775	12	-1
1107	AX-90367764	12	-1
1108	AX-90372411	12	-1
1109	AX-90382889	12	-1
1110	AX-90391931	12	-1
1111	AX-90392807	12	-1
1112	AX-90394086	12	-1
1113	AX-90410923	12	-1
1114	AX-90411872	12	-1
1115	AX-90413882	12	-1
1116	AX-90414181	12	-1
1117	AX-90418024	12	-1
1118	AX-90420426	12	-1
1119	AX-90422850	12	-1
1120	AX-90426033	12	-1
1121	AX-90428633	12	-1
1122	AX-90429261	12	-1
1123	AX-90429278	12	-1
1124	AX-90433781	12	-1
1125	AX-90434989	12	-1
1126	AX-90441458	12	-1
1127	AX-90442468	12	-1
1128	AX-90442495	12	-1
1129	AX-90446305	12	-1
1130	AX-90447601	12	-1
1131	AX-90449555	12	-1
1132	AX-90452246	12	-1
1133	AX-90457237	12	-1
1134	AX-90471484	12	-1
1135	AX-90491218	12	-1
1136	AX-90502763	12	-1
1137	AX-90504274	12	-1
1138	AX-90505906	12	-1
1139	AX-90506821	12	-1
1140	AX-90510965	12	-1
1141	AX-90306482	13	-1
1142	AX-90308459	13	-1
1143	AX-90308613	13	-1
1144	AX-90309181	13	-1
1145	AX-90309351	13	-1
1146	AX-90309666	13	-1
1147	AX-90309717	13	-1
1148	AX-90310054	13	-1
1149	AX-90317208	13	-1
1150	AX-90318660	13	-1
1151	AX-90318910	13	-1
1152	AX-90319596	13	-1
1153	AX-90322849	13	-1
1154	AX-90322866	13	-1
1155	AX-90326951	13	-1
1156	AX-90329770	13	-1
1157	AX-90330110	13	-1
1158	AX-90333248	13	-1
1159	AX-90333593	13	-1
1160	AX-90334557	13	-1
1161	AX-90334923	13	-1
1162	AX-90336511	13	-1
1163	AX-90336858	13	-1
1164	AX-90338644	13	-1
1165	AX-90343047	13	-1
1166	AX-90344148	13	-1
1167	AX-90346758	13	-1
1168	AX-90347026	13	-1
1169	AX-90348284	13	-1
1170	AX-90348673	13	-1
1171	AX-90353527	13	-1
1172	AX-90357938	13	-1
1173	AX-90361101	13	-1
1174	AX-90362564	13	-1
1175	AX-90362835	13	-1
1176	AX-90362874	13	-1
1177	AX-90364149	13	-1
1178	AX-90368607	13	-1
1179	AX-90370193	13	-1
1180	AX-90374043	13	-1
1181	AX-90374818	13	-1
1182	AX-90376594	13	-1
1183	AX-90376857	13	-1
1184	AX-90381550	13	-1
1185	AX-90382278	13	-1
1186	AX-90384913	13	-1
1187	AX-90385878	13	-1
1188	AX-90386417	13	-1
1189	AX-90387214	13	-1
1190	AX-90389361	13	-1
1191	AX-90389503	13	-1
1192	AX-90389519	13	-1
1193	AX-90390255	13	-1
1194	AX-90390546	13	-1
1195	AX-90391072	13	-1
1196	AX-90392744	13	-1
1197	AX-90394257	13	-1
1198	AX-90394675	13	-1
1199	AX-90395547	13	-1
1200	AX-90408527	13	-1
1201	AX-90410330	13	-1
1202	AX-90411124	13	-1
1203	AX-90414965	13	-1
1204	AX-90415971	13	-1
1205	AX-90421106	13	-1
1206	AX-90421958	13	-1
1207	AX-90422194	13	-1
1208	AX-90425813	13	-1
1209	AX-90427456	13	-1
1210	AX-90430995	13	-1
1211	AX-90433376	13	-1
1212	AX-90433556	13	-1
1213	AX-90433702	13	-1
1214	AX-90434228	13	-1
1215	AX-90434685	13	-1
1216	AX-90434866	13	-1
1217	AX-90435449	13	-1
1218	AX-90436207	13	-1
1219	AX-90437101	13	-1
1220	AX-90437654	13	-1
1221	AX-90439634	13	-1
1222	AX-90439955	13	-1
1223	AX-90439971	13	-1
1224	AX-90440326	13	-1
1225	AX-90440949	13	-1
1226	AX-90441721	13	-1
1227	AX-90441833	13	-1
1228	AX-90443921	13	-1
1229	AX-90446600	13	-1
1230	AX-90448324	13	-1
1231	AX-90450450	13	-1
1232	AX-90451049	13	-1
1233	AX-90451068	13	-1
1234	AX-90451211	13	-1
1235	AX-90451245	13	-1
1236	AX-90451874	13	-1
1237	AX-90452631	13	-1
1238	AX-90452851	13	-1
1239	AX-90456261	13	-1
1240	AX-90460604	13	-1
1241	AX-90462531	13	-1
1242	AX-90463134	13	-1
1243	AX-90463363	13	-1
1244	AX-90465836	13	-1
1245	AX-90465933	13	-1
1246	AX-90466701	13	-1
1247	AX-90467111	13	-1
1248	AX-90467824	13	-1
1249	AX-90467844	13	-1
1250	AX-90468166	13	-1
1251	AX-90469010	13	-1
1252	AX-90470641	13	-1
1253	AX-90472550	13	-1
1254	AX-90476808	13	-1
1255	AX-90478661	13	-1
1256	AX-90479745	13	-1
1257	AX-90481268	13	-1
1258	AX-90488005	13	-1
1259	AX-90491941	13	-1
1260	AX-90492717	13	-1
1261	AX-90493820	13	-1
1262	AX-90499102	13	-1
1263	AX-90501665	13	-1
1264	AX-90502480	13	-1
1265	AX-90503548	13	-1
1266	AX-90504281	13	-1
1267	AX-90505070	13	-1
1268	AX-90508160	13	-1
1269	AX-90508701	13	-1
1270	AX-90508824	13	-1
1271	AX-90511704	13	-1
1272	AX-90512111	13	-1
1273	AX-90513557	13	-1
1274	AX-90513820	13	-1
1275	AX-90514887	13	-1
1276	AX-90515810	13	-1
1277	AX-90517061	13	-1
1278	AX-90517350	13	-1
1279	AX-90519544	13	-1
1280	AX-90520664	13	-1
1281	AX-90521494	13	-1
1282	AX-90522287	13	-1
1283	AX-90523206	13	-1
1284	AX-90525316	13	-1
1285	AX-90525476	13	-1
1286	AX-90305226	14	-1
1287	AX-90305444	14	-1
1288	AX-90305796	14	-1
1289	AX-90306179	14	-1
1290	AX-90307028	14	-1
1291	AX-90308518	14	-1
1292	AX-90309008	14	-1
1293	AX-90310558	14	-1
1294	AX-90312718	14	-1
1295	AX-90313904	14	-1
1296	AX-90315288	14	-1
1297	AX-90318831	14	-1
1298	AX-90319635	14	-1
1299	AX-90321880	14	-1
1300	AX-90326051	14	-1
1301	AX-90326166	14	-1
1302	AX-90326240	14	-1
1303	AX-90331737	14	-1
1304	AX-90331821	14	-1
1305	AX-90333556	14	-1
1306	AX-90333672	14	-1
1307	AX-90334093	14	-1
1308	AX-90335322	14	-1
1309	AX-90336197	14	-1
1310	AX-90338849	14	-1
1311	AX-90340127	14	-1
1312	AX-90342508	14	-1
1313	AX-90346329	14	-1
1314	AX-90348627	14	-1
1315	AX-90349313	14	-1
1316	AX-90350643	14	-1
1317	AX-90357118	14	-1
1318	AX-90361851	14	-1
1319	AX-90363259	14	-1
1320	AX-90363625	14	-1
1321	AX-90375177	14	-1
1322	AX-90375699	14	-1
1323	AX-90377241	14	-1
1324	AX-90377836	14	-1
1325	AX-90379378	14	-1
1326	AX-90384020	14	-1
1327	AX-90387722	14	-1
1328	AX-90388190	14	-1
1329	AX-90391583	14	-1
1330	AX-90392132	14	-1
1331	AX-90393636	14	-1
1332	AX-90395683	14	-1
1333	AX-90396157	14	-1
1334	AX-90397007	14	-1
1335	AX-90397447	14	-1
1336	AX-90397755	14	-1
1337	AX-90402060	14	-1
1338	AX-90405271	14	-1
1339	AX-90411882	14	-1
1340	AX-90415530	14	-1
1341	AX-90416183	14	-1
1342	AX-90417601	14	-1
1343	AX-90419064	14	-1
1344	AX-90420518	14	-1
1345	AX-90422435	14	-1
1346	AX-90423710	14	-1
1347	AX-90425115	14	-1
1348	AX-90425550	14	-1
1349	AX-90426450	14	-1
1350	AX-90426796	14	-1
1351	AX-90430726	14	-1
1352	AX-90435332	14	-1
1353	AX-90442437	14	-1
1354	AX-90445298	14	-1
1355	AX-90445575	14	-1
1356	AX-90447122	14	-1
1357	AX-90447223	14	-1
1358	AX-90447446	14	-1
1359	AX-90449441	14	-1
1360	AX-90449852	14	-1
1361	AX-90451840	14	-1
1362	AX-90454680	14	-1
1363	AX-90455551	14	-1
1364	AX-90455926	14	-1
1365	AX-90459104	14	-1
1366	AX-90460321	14	-1
1367	AX-90461609	14	-1
1368	AX-90462466	14	-1
1369	AX-90464825	14	-1
1370	AX-90467567	14	-1
1371	AX-90469070	14	-1
1372	AX-90471285	14	-1
1373	AX-90473505	14	-1
1374	AX-90474697	14	-1
1375	AX-90475298	14	-1
1376	AX-90476583	14	-1
1377	AX-90477023	14	-1
1378	AX-90484626	14	-1
1379	AX-90490467	14	-1
1380	AX-90490883	14	-1
1381	AX-90492907	14	-1
1382	AX-90493144	14	-1
1383	AX-90494087	14	-1
1384	AX-90494370	14	-1
1385	AX-90495329	14	-1
1386	AX-90495446	14	-1
1387	AX-90496316	14	-1
1388	AX-90496602	14	-1
1389	AX-90497675	14	-1
1390	AX-90503086	14	-1
1391	AX-90503624	14	-1
1392	AX-90507779	14	-1
1393	AX-90507869	14	-1
1394	AX-90508277	14	-1
1395	AX-90510403	14	-1
1396	AX-90515396	14	-1
1397	AX-90515706	14	-1
1398	AX-90516862	14	-1
1399	AX-90521187	14	-1
1400	AX-90522204	14	-1
1401	AX-90523717	14	-1
1402	AX-90305391	15	-1
1403	AX-90305835	15	-1
1404	AX-90307831	15	-1
1405	AX-90308517	15	-1
1406	AX-90308830	15	-1
1407	AX-90314905	15	-1
1408	AX-90315684	15	-1
1409	AX-90316001	15	-1
1410	AX-90317044	15	-1
1411	AX-90321226	15	-1
1412	AX-90323122	15	-1
1413	AX-90328152	15	-1
1414	AX-90329712	15	-1
1415	AX-90331111	15	-1
1416	AX-90331776	15	-1
1417	AX-90333011	15	-1
1418	AX-90333769	15	-1
1419	AX-90334886	15	-1
1420	AX-90335446	15	-1
1421	AX-90335950	15	-1
1422	AX-90336083	15	-1
1423	AX-90337144	15	-1
1424	AX-90338798	15	-1
1425	AX-90339269	15	-1
1426	AX-90339325	15	-1
1427	AX-90339453	15	-1
1428	AX-90340739	15	-1
1429	AX-90341086	15	-1
1430	AX-90341761	15	-1
1431	AX-90344641	15	-1
1432	AX-90344769	15	-1
1433	AX-90345117	15	-1
1434	AX-90348700	15	-1
1435	AX-90350816	15	-1
1436	AX-90353310	15	-1
1437	AX-90357322	15	-1
1438	AX-90362366	15	-1
1439	AX-90363091	15	-1
1440	AX-90363149	15	-1
1441	AX-90363507	15	-1
1442	AX-90363954	15	-1
1443	AX-90364732	15	-1
1444	AX-90365465	15	-1
1445	AX-90369976	15	-1
1446	AX-90370371	15	-1
1447	AX-90372350	15	-1
1448	AX-90373394	15	-1
1449	AX-90375030	15	-1
1450	AX-90376733	15	-1
1451	AX-90377482	15	-1
1452	AX-90380711	15	-1
1453	AX-90380850	15	-1
1454	AX-90381469	15	-1
1455	AX-90385751	15	-1
1456	AX-90386667	15	-1
1457	AX-90387327	15	-1
1458	AX-90387467	15	-1
1459	AX-90387974	15	-1
1460	AX-90390997	15	-1
1461	AX-90392320	15	-1
1462	AX-90394753	15	-1
1463	AX-90395018	15	-1
1464	AX-90395536	15	-1
1465	AX-90395865	15	-1
1466	AX-90397260	15	-1
1467	AX-90397822	15	-1
1468	AX-90397984	15	-1
1469	AX-90398406	15	-1
1470	AX-90398949	15	-1
1471	AX-90400368	15	-1
1472	AX-90403238	15	-1
1473	AX-90406116	15	-1
1474	AX-90406693	15	-1
1475	AX-90406835	15	-1
1476	AX-90407209	15	-1
1477	AX-90408040	15	-1
1478	AX-90409338	15	-1
1479	AX-90410482	15	-1
1480	AX-90412780	15	-1
1481	AX-90418166	15	-1
1482	AX-90419028	15	-1
1483	AX-90419380	15	-1
1484	AX-90419893	15	-1
1485	AX-90420031	15	-1
1486	AX-90420627	15	-1
1487	AX-90420925	15	-1
1488	AX-90422290	15	-1
1489	AX-90423395	15	-1
1490	AX-90423541	15	-1
1491	AX-90424378	15	-1
1492	AX-90424447	15	-1
1493	AX-90427310	15	-1
1494	AX-90427529	15	-1
1495	AX-90427862	15	-1
1496	AX-90428985	15	-1
1497	AX-90431046	15	-1
1498	AX-90432010	15	-1
1499	AX-90432914	15	-1
1500	AX-90433529	15	-1
1501	AX-90433813	15	-1
1502	AX-90433819	15	-1
1503	AX-90434391	15	-1
1504	AX-90434590	15	-1
1505	AX-90435390	15	-1
1506	AX-90436049	15	-1
1507	AX-90436342	15	-1
1508	AX-90440184	15	-1
1509	AX-90440742	15	-1
1510	AX-90442635	15	-1
1511	AX-90446710	15	-1
1512	AX-90446903	15	-1
1513	AX-90447643	15	-1
1514	AX-90448559	15	-1
1515	AX-90449703	15	-1
1516	AX-90449713	15	-1
1517	AX-90453752	15	-1
1518	AX-90458331	15	-1
1519	AX-90459992	15	-1
1520	AX-90460677	15	-1
1521	AX-90461013	15	-1
1522	AX-90461232	15	-1
1523	AX-90461479	15	-1
1524	AX-90461728	15	-1
1525	AX-90462815	15	-1
1526	AX-90462895	15	-1
1527	AX-90463297	15	-1
1528	AX-90464069	15	-1
1529	AX-90464166	15	-1
1530	AX-90464900	15	-1
1531	AX-90467119	15	-1
1532	AX-90468803	15	-1
1533	AX-90469014	15	-1
1534	AX-90470421	15	-1
1535	AX-90470771	15	-1
1536	AX-90470854	15	-1
1537	AX-90474167	15	-1
1538	AX-90477235	15	-1
1539	AX-90478202	15	-1
1540	AX-90478785	15	-1
1541	AX-90479347	15	-1
1542	AX-90480910	15	-1
1543	AX-90481490	15	-1
1544	AX-90483610	15	-1
1545	AX-90483831	15	-1
1546	AX-90484517	15	-1
1547	AX-90485746	15	-1
1548	AX-90486523	15	-1
1549	AX-90486890	15	-1
1550	AX-90487524	15	-1
1551	AX-90488633	15	-1
1552	AX-90489152	15	-1
1553	AX-90489326	15	-1
1554	AX-90489589	15	-1
1555	AX-90492766	15	-1
1556	AX-90493116	15	-1
1557	AX-90493322	15	-1
1558	AX-90494465	15	-1
1559	AX-90495773	15	-1
1560	AX-90495786	15	-1
1561	AX-90496500	15	-1
1562	AX-90497881	15	-1
1563	AX-90498876	15	-1
1564	AX-90498895	15	-1
1565	AX-90501162	15	-1
1566	AX-90501650	15	-1
1567	AX-90501991	15	-1
1568	AX-90502012	15	-1
1569	AX-90502114	15	-1
1570	AX-90502533	15	-1
1571	AX-90508815	15	-1
1572	AX-90509575	15	-1
1573	AX-90509703	15	-1
1574	AX-90511377	15	-1
1575	AX-90511846	15	-1
1576	AX-90512439	15	-1
1577	AX-90513067	15	-1
1578	AX-90513987	15	-1
1579	AX-90517283	15	-1
1580	AX-90520541	15	-1
1581	AX-90521394	15	-1
1582	AX-90521883	15	-1
1583	AX-90522069	15	-1
1584	AX-90522113	15	-1
1585	AX-90522130	15	-1
1586	AX-90522271	15	-1
1587	AX-90522441	15	-1
1588	AX-90523125	15	-1
1589	AX-90523676	15	-1
1590	AX-90524303	15	-1
1591	AX-90307247	16	-1
1592	AX-90307462	16	-1
1593	AX-90308438	16	-1
1594	AX-90309727	16	-1
1595	AX-90314884	16	-1
1596	AX-90315763	16	-1
1597	AX-90316443	16	-1
1598	AX-90317645	16	-1
1599	AX-90317742	16	-1
1600	AX-90318926	16	-1
1601	AX-90321047	16	-1
1602	AX-90322639	16	-1
1603	AX-90324805	16	-1
1604	AX-90325222	16	-1
1605	AX-90326012	16	-1
1606	AX-90327568	16	-1
1607	AX-90331633	16	-1
1608	AX-90331726	16	-1
1609	AX-90331836	16	-1
1610	AX-90332597	16	-1
1611	AX-90335147	16	-1
1612	AX-90336433	16	-1
1613	AX-90336704	16	-1
1614	AX-90337088	16	-1
1615	AX-90337755	16	-1
1616	AX-90340975	16	-1
1617	AX-90342023	16	-1
1618	AX-90343136	16	-1
1619	AX-90343428	16	-1
1620	AX-90344532	16	-1
1621	AX-90345934	16	-1
1622	AX-90346045	16	-1
1623	AX-90348023	16	-1
1624	AX-90349740	16	-1
1625	AX-90350291	16	-1
1626	AX-90352173	16	-1
1627	AX-90352887	16	-1
1628	AX-90354984	16	-1
1629	AX-90358563	16	-1
1630	AX-90359460	16	-1
1631	AX-90360641	16	-1
1632	AX-90363898	16	-1
1633	AX-90364238	16	-1
1634	AX-90364945	16	-1
1635	AX-90366381	16	-1
1636	AX-90369339	16	-1
1637	AX-90370000	16	-1
1638	AX-90370363	16	-1
1639	AX-90375329	16	-1
1640	AX-90376429	16	-1
1641	AX-90376783	16	-1
1642	AX-90384712	16	-1
1643	AX-90389191	16	-1
1644	AX-90390353	16	-1
1645	AX-90391278	16	-1
1646	AX-90391988	16	-1
1647	AX-90399067	16	-1
1648	AX-90399375	16	-1
1649	AX-90408292	16	-1
1650	AX-90411927	16	-1
1651	AX-90413364	16	-1
1652	AX-90418853	16	-1
1653	AX-90421760	16	-1
1654	AX-90421814	16	-1
1655	AX-90422162	16	-1
1656	AX-90424114	16	-1
1657	AX-90424369	16	-1
1658	AX-90426807	16	-1
1659	AX-90428061	16	-1
1660	AX-90431285	16	-1
1661	AX-90431944	16	-1
1662	AX-90434170	16	-1
1663	AX-90434218	16	-1
1664	AX-90434702	16	-1
1665	AX-90435280	16	-1
1666	AX-90435569	16	-1
1667	AX-90436302	16	-1
1668	AX-90441099	16	-1
1669	AX-90444490	16	-1
1670	AX-90445998	16	-1
1671	AX-90449675	16	-1
1672	AX-90450571	16	-1
1673	AX-90457708	16	-1
1674	AX-90458864	16	-1
1675	AX-90462625	16	-1
1676	AX-90466585	16	-1
1677	AX-90467541	16	-1
1678	AX-90470260	16	-1
1679	AX-90477147	16	-1
1680	AX-90477527	16	-1
1681	AX-90478894	16	-1
1682	AX-90479050	16	-1
1683	AX-90479995	16	-1
1684	AX-90481722	16	-1
1685	AX-90484815	16	-1
1686	AX-90487105	16	-1
1687	AX-90488026	16	-1
1688	AX-90488465	16	-1
1689	AX-90490387	16	-1
1690	AX-90494223	16	-1
1691	AX-90498676	16	-1
1692	AX-90501735	16	-1
1693	AX-90502129	16	-1
1694	AX-90502339	16	-1
1695	AX-90504548	16	-1
1696	AX-90515822	16	-1
1697	AX-90518047	16	-1
1698	AX-90522085	16	-1
1699	AX-90307810	17	-1
1700	AX-90309527	17	-1
1701	AX-90318896	17	-1
1702	AX-90319100	17	-1
1703	AX-90321719	17	-1
1704	AX-90324847	17	-1
1705	AX-90324994	17	-1
1706	AX-90326200	17	-1
1707	AX-90328114	17	-1
1708	AX-90331513	17	-1
1709	AX-90332651	17	-1
1710	AX-90334174	17	-1
1711	AX-90338832	17	-1
1712	AX-90339375	17	-1
1713	AX-90341171	17	-1
1714	AX-90343853	17	-1
1715	AX-90350646	17	-1
1716	AX-90351797	17	-1
1717	AX-90353880	17	-1
1718	AX-90363453	17	-1
1719	AX-90364691	17	-1
1720	AX-90370392	17	-1
1721	AX-90374356	17	-1
1722	AX-90377299	17	-1
1723	AX-90378019	17	-1
1724	AX-90380509	17	-1
1725	AX-90383474	17	-1
1726	AX-90385261	17	-1
1727	AX-90386358	17	-1
1728	AX-90386744	17	-1
1729	AX-90386812	17	-1
1730	AX-90387819	17	-1
1731	AX-90387912	17	-1
1732	AX-90392668	17	-1
1733	AX-90396323	17	-1
1734	AX-90402439	17	-1
1735	AX-90403258	17	-1
1736	AX-90409587	17	-1
1737	AX-90409634	17	-1
1738	AX-90410204	17	-1
1739	AX-90412265	17	-1
1740	AX-90414395	17	-1
1741	AX-90416011	17	-1
1742	AX-90416765	17	-1
1743	AX-90418217	17	-1
1744	AX-90419867	17	-1
1745	AX-90431025	17	-1
1746	AX-90433695	17	-1
1747	AX-90434148	17	-1
1748	AX-90436148	17	-1
1749	AX-90437510	17	-1
1750	AX-90437681	17	-1
1751	AX-90438647	17	-1
1752	AX-90438809	17	-1
1753	AX-90440547	17	-1
1754	AX-90440567	17	-1
1755	AX-90440931	17	-1
1756	AX-90440992	17	-1
1757	AX-90445797	17	-1
1758	AX-90445992	17	-1
1759	AX-90446654	17	-1
1760	AX-90446882	17	-1
1761	AX-90447607	17	-1
1762	AX-90447617	17	-1
1763	AX-90448224	17	-1
1764	AX-90451481	17	-1
1765	AX-90454815	17	-1
1766	AX-90455314	17	-1
1767	AX-90455487	17	-1
1768	AX-90457118	17	-1
1769	AX-90457637	17	-1
1770	AX-90458219	17	-1
1771	AX-90458562	17	-1
1772	AX-90461258	17	-1
1773	AX-90463979	17	-1
1774	AX-90471571	17	-1
1775	AX-90471855	17	-1
1776	AX-90472331	17	-1
1777	AX-90476227	17	-1
1778	AX-90478007	17	-1
1779	AX-90478290	17	-1
1780	AX-90478343	17	-1
1781	AX-90481374	17	-1
1782	AX-90482513	17	-1
1783	AX-90484965	17	-1
1784	AX-90485941	17	-1
1785	AX-90490084	17	-1
1786	AX-90493262	17	-1
1787	AX-90494469	17	-1
1788	AX-90496250	17	-1
1789	AX-90497128	17	-1
1790	AX-90500534	17	-1
1791	AX-90501879	17	-1
1792	AX-90504700	17	-1
1793	AX-90510132	17	-1
1794	AX-90512939	17	-1
1795	AX-90512974	17	-1
1796	AX-90515926	17	-1
1797	AX-90516240	17	-1
1798	AX-90516718	17	-1
1799	AX-90519844	17	-1
1800	AX-90522038	17	-1
1801	AX-90525157	17	-1
1802	AX-90525342	17	-1
1803	AX-90305382	18	-1
1804	AX-90307899	18	-1
1805	AX-90311420	18	-1
1806	AX-90311983	18	-1
1807	AX-90313401	18	-1
1808	AX-90313854	18	-1
1809	AX-90316143	18	-1
1810	AX-90317298	18	-1
1811	AX-90317299	18	-1
1812	AX-90317590	18	-1
1813	AX-90318165	18	-1
1814	AX-90318246	18	-1
1815	AX-90324568	18	-1
1816	AX-90327346	18	-1
1817	AX-90327625	18	-1
1818	AX-90328673	18	-1
1819	AX-90329098	18	-1
1820	AX-90331368	18	-1
1821	AX-90332618	18	-1
1822	AX-90333923	18	-1
1823	AX-90336865	18	-1
1824	AX-90339272	18	-1
1825	AX-90339926	18	-1
1826	AX-90340218	18	-1
1827	AX-90340881	18	-1
1828	AX-90341215	18	-1
1829	AX-90342001	18	-1
1830	AX-90345336	18	-1
1831	AX-90347647	18	-1
1832	AX-90348069	18	-1
1833	AX-90348406	18	-1
1834	AX-90348927	18	-1
1835	AX-90349143	18	-1
1836	AX-90349642	18	-1
1837	AX-90350851	18	-1
1838	AX-90352195	18	-1
1839	AX-90352623	18	-1
1840	AX-90353053	18	-1
1841	AX-90353160	18	-1
1842	AX-90355772	18	-1
1843	AX-90357528	18	-1
1844	AX-90357563	18	-1
1845	AX-90357564	18	-1
1846	AX-90362075	18	-1
1847	AX-90363620	18	-1
1848	AX-90363664	18	-1
1849	AX-90366049	18	-1
1850	AX-90367666	18	-1
1851	AX-90368735	18	-1
1852	AX-90369655	18	-1
1853	AX-90375355	18	-1
1854	AX-90379485	18	-1
1855	AX-90379893	18	-1
1856	AX-90381707	18	-1
1857	AX-90383082	18	-1
1858	AX-90383918	18	-1
1859	AX-90383950	18	-1
1860	AX-90384153	18	-1
1861	AX-90385814	18	-1
1862	AX-90385882	18	-1
1863	AX-90386233	18	-1
1864	AX-90386998	18	-1
1865	AX-90389265	18	-1
1866	AX-90392535	18	-1
1867	AX-90394058	18	-1
1868	AX-90395289	18	-1
1869	AX-90398272	18	-1
1870	AX-90398748	18	-1
1871	AX-90401310	18	-1
1872	AX-90402895	18	-1
1873	AX-90403306	18	-1
1874	AX-90406008	18	-1
1875	AX-90408468	18	-1
1876	AX-90412385	18	-1
1877	AX-90412720	18	-1
1878	AX-90413813	18	-1
1879	AX-90414238	18	-1
1880	AX-90416155	18	-1
1881	AX-90416751	18	-1
1882	AX-90418050	18	-1
1883	AX-90419316	18	-1
1884	AX-90420838	18	-1
1885	AX-90423430	18	-1
1886	AX-90425312	18	-1
1887	AX-90425824	18	-1
1888	AX-90426462	18	-1
1889	AX-90426597	18	-1
1890	AX-90426750	18	-1
1891	AX-90427134	18	-1
1892	AX-90427400	18	-1
1893	AX-90427888	18	-1
1894	AX-90428702	18	-1
1895	AX-90429935	18	-1
1896	AX-90430847	18	-1
1897	AX-90432974	18	-1
1898	AX-90433753	18	-1
1899	AX-90434561	18	-1
1900	AX-90434884	18	-1
1901	AX-90435392	18	-1
1902	AX-90436289	18	-1
1903	AX-90436872	18	-1
1904	AX-90439088	18	-1
1905	AX-90439797	18	-1
1906	AX-90440477	18	-1
1907	AX-90443501	18	-1
1908	AX-90445119	18	-1
1909	AX-90448333	18	-1
1910	AX-90450389	18	-1
1911	AX-90455077	18	-1
1912	AX-90456267	18	-1
1913	AX-90457681	18	-1
1914	AX-90458620	18	-1
1915	AX-90459077	18	-1
1916	AX-90460731	18	-1
1917	AX-90461723	18	-1
1918	AX-90461950	18	-1
1919	AX-90462250	18	-1
1920	AX-90463477	18	-1
1921	AX-90463904	18	-1
1922	AX-90470317	18	-1
1923	AX-90471323	18	-1
1924	AX-90472860	18	-1
1925	AX-90475647	18	-1
1926	AX-90476479	18	-1
1927	AX-90480284	18	-1
1928	AX-90481021	18	-1
1929	AX-90485976	18	-1
1930	AX-90486150	18	-1
1931	AX-90486335	18	-1
1932	AX-90487007	18	-1
1933	AX-90487357	18	-1
1934	AX-90488998	18	-1
1935	AX-90489284	18	-1
1936	AX-90490446	18	-1
1937	AX-90491252	18	-1
1938	AX-90491623	18	-1
1939	AX-90492706	18	-1
1940	AX-90493049	18	-1
1941	AX-90497541	18	-1
1942	AX-90500307	18	-1
1943	AX-90501229	18	-1
1944	AX-90502213	18	-1
1945	AX-90502250	18	-1
1946	AX-90504978	18	-1
1947	AX-90507446	18	-1
1948	AX-90509332	18	-1
1949	AX-90509730	18	-1
1950	AX-90514114	18	-1
1951	AX-90514333	18	-1
1952	AX-90514602	18	-1
1953	AX-90516267	18	-1
1954	AX-90516636	18	-1
1955	AX-90517818	18	-1
1956	AX-90518598	18	-1
1957	AX-90520764	18	-1
1958	AX-90520858	18	-1
1959	AX-90522148	18	-1
1960	AX-90522444	18	-1
1961	AX-90522674	18	-1
1962	AX-90523167	18	-1
1963	AX-90524096	18	-1
1964	AX-90524879	18	-1
1965	AX-90525432	18	-1
1966	AX-90305065	19	-1
1967	AX-90306446	19	-1
1968	AX-90306450	19	-1
1969	AX-90311998	19	-1
1970	AX-90314011	19	-1
1971	AX-90316513	19	-1
1972	AX-90317673	19	-1
1973	AX-90318186	19	-1
1974	AX-90320122	19	-1
1975	AX-90324279	19	-1
1976	AX-90325371	19	-1
1977	AX-90332387	19	-1
1978	AX-90332678	19	-1
1979	AX-90339857	19	-1
1980	AX-90344369	19	-1
1981	AX-90344416	19	-1
1982	AX-90351539	19	-1
1983	AX-90352535	19	-1
1984	AX-90353611	19	-1
1985	AX-90354071	19	-1
1986	AX-90358264	19	-1
1987	AX-90361098	19	-1
1988	AX-90366029	19	-1
1989	AX-90368820	19	-1
1990	AX-90370223	19	-1
1991	AX-90373207	19	-1
1992	AX-90375189	19	-1
1993	AX-90375773	19	-1
1994	AX-90377852	19	-1
[truncated: 18,904 more rows]
