# Supplementary material for: Identification of QTL for Tolerance to Flooding Stress at Seedling Stage of Soybean (Glycine max L. Merr.)
Source: MDPI journal article supplement (doi:10.3390/agronomy11050908), 2021-05-05
Supplement: s1 [file s1 › Supplementary files_agronomy-1150316/Supplementary Table S3.pdf]

**Article title:** Identification of QTL for tolerance to flooding stress at seedling stage of soybean (*Glycine max* L. Merr.)

**Journal name:** Agronomy

**Authors name:** Sanjeev K. Dhungana, Hong-Sik Kim\*, Beom-Kyu Kang, Jeong-Hyun Seo, Hyun-Tae Kim, Sang-Ouk Shin, Jae-Hyeon Oh and In-Yeol Baek

**Email address of corresponding author:** [kimhongs@korea.kr](mailto:kimhongs@korea.kr)

**Supplementary Table S3.** Candidate genes residing in the QTL hot spots on chromosomes 3 and 7.

| SN | Candidate gene       | Chr (LG) <sup>1</sup> | Functional annotation                                                                                                                                                                                                                                                                                                                                                                                                                                                                                                                   | Physical position (bp) |
|----|----------------------|-----------------------|-----------------------------------------------------------------------------------------------------------------------------------------------------------------------------------------------------------------------------------------------------------------------------------------------------------------------------------------------------------------------------------------------------------------------------------------------------------------------------------------------------------------------------------------|------------------------|
| 1  | <i>Glyma03g34900</i> | 3 (N)                 | Heat stress transcription factor A-3-like                                                                                                                                                                                                                                                                                                                                                                                                                                                                                               | 42,204,661–42,207,243  |
| 2  | <i>Glyma03g35010</i> | 3 (N)                 | Growth-regulating factor 3; IPR014977 (WRC), IPR014978 (Glutamine-Leucine-Glutamine, QLQ); GO:0005524 (ATP binding), GO:0005634 (nucleus)                                                                                                                                                                                                                                                                                                                                                                                               | 42,329,293–42,333,130  |
| 3  | <i>Glyma03g35180</i> | 3 (N)                 | Zinc finger A20 and AN1 domain stress-associated protein; IPR000058 (Zinc finger, AN1-type), IPR002653 (Zinc finger, A20-type); GO:0003677 (DNA binding), GO:0008270 (zinc ion binding)                                                                                                                                                                                                                                                                                                                                                 | 42,486,016–42,487,910  |
| 4  | <i>Glyma07g13040</i> | 7 (M)                 | Transforming growth factor-beta receptor-associated protein 1 homolog isoform X1 [ <i>Glycine max</i> ]; IPR000547 (Clathrin, heavy chain/VPS, 7-fold repeat), IPR001180 (Citron-like), IPR019452 (Vacuolar sorting protein 39/Transforming growth factor beta receptor-associated domain 1), IPR019453 (Vacuolar sorting protein 39/Transforming growth factor beta receptor-associated domain 2); GO:0005083 (small GTPase regulator activity), GO:0006886 (intracellular protein transport), GO:0016192 (vesicle-mediated transport) | 11,527,805–11,548,310  |
| 5  | <i>Glyma07g03360</i> | 7 (M)                 | Post-illumination chlorophyll fluorescence increase                                                                                                                                                                                                                                                                                                                                                                                                                                                                                     | 2,363,156–2,366,631    |
| 6  | <i>Glyma07g03880</i> | 7 (M)                 | Stress response protein NST1-like                                                                                                                                                                                                                                                                                                                                                                                                                                                                                                       | 2,720,074–2,725,669    |
| 7  | <i>Glyma07g04090</i> | 7 (M)                 | Transcription factor regulating root and shoot growth via Pin3                                                                                                                                                                                                                                                                                                                                                                                                                                                                          | 2,953,003–2,957,837    |
| 8  | <i>Glyma07g04290</i> | 7 (M)                 | Growth-regulating factor 5; IPR014977 (WRC), IPR014978 (Glutamine-Leucine-Glutamine, QLQ); GO:0005524 (ATP binding), GO:0005634 (nucleus)                                                                                                                                                                                                                                                                                                                                                                                               | 3,149,413–3,151,946    |
| 9  | <i>Glyma07g05320</i> | 7 (M)                 | Light-harvesting chlorophyll B-binding protein 3; IPR022796 (Chlorophyll A-B binding protein), IPR023329 (Chlorophyll a/b binding protein domain); GO:0016020 (membrane)                                                                                                                                                                                                                                                                                                                                                                | 3,963,068–3,965,547    |
| 10 | <i>Glyma07g09430</i> | 7 (M)                 | Probable chlorophyll(ide) b reductase NYC1, chloroplastic                                                                                                                                                                                                                                                                                                                                                                                                                                                                               | 7,871,313–7,875,853    |

<sup>1</sup>Chromosome (Chr) and linkage group (LG).
