# Supplementary material for: Identification of QTL for Tolerance to Flooding Stress at Seedling Stage of Soybean (Glycine max L. Merr.)
Source: MDPI journal article supplement (doi:10.3390/agronomy11050908), 2021-05-05
Supplement: s1 [file s1 › Supplementary files_agronomy-1150316/Supplementary Table S4.xlsx]

## Sheet: Supplementary Table S4
Article title: Identification of QTL for tolerance to flooding stress at seedling stage of soybean (Glycine max L. Merr.)
Journal name: Agronomy
Authors name: Sanjeev K. Dhungana, Hong-Sik Kim*, Beom-Kyu Kang, Jeong-Hyun Seo, Hyun-Tae Kim, Sang-Ouk Shin, Jae-Hyeon Oh and In-Yeol Baek
Email address of corresponding author: kimhongs@korea.kr
Supplementary Table S4. List of RILs that showed positive and negative transgressive segregation based on the mean flooding tolerance index (FTI) of 2017 and 2018.
SN	RILs with positive transgressive segregation	RILs with negative transgressive segregation
1	18R48-3	18R48-25
2	18R48-4	18R48-41
3	18R48-12	18R48-50
4	18R48-14	18R48-65
5	18R48-17	18R48-69
6	18R48-18	18R48-73
7	18R48-20	18R48-75
8	18R48-21	18R48-76
9	18R48-22	18R48-105
10	18R48-24	18R48-108
11	18R48-27
12	18R48-37
13	18R48-42
14	18R48-43
15	18R48-44
16	18R48-45
17	18R48-46
18	18R48-51
19	18R48-67
20	18R48-68
21	18R48-70
22	18R48-74
23	18R48-81
24	18R48-84
25	18R48-85
26	18R48-87
27	18R48-90
28	18R48-92
29	18R48-94
30	18R48-95
31	18R48-102
32	18R48-107
33	18R48-110
34	18R48-115
35	18R48-117
36	18R48-124
37	18R48-125
38	18R48-126
39	18R48-139
40	18R48-143
41	18R48-149
