# Supplementary figures and images for: Identification of QTL for Tolerance to Flooding Stress at Seedling Stage of Soybean (Glycine max L. Merr.)
Source: MDPI journal article supplement (doi:10.3390/agronomy11050908), 2021-05-05

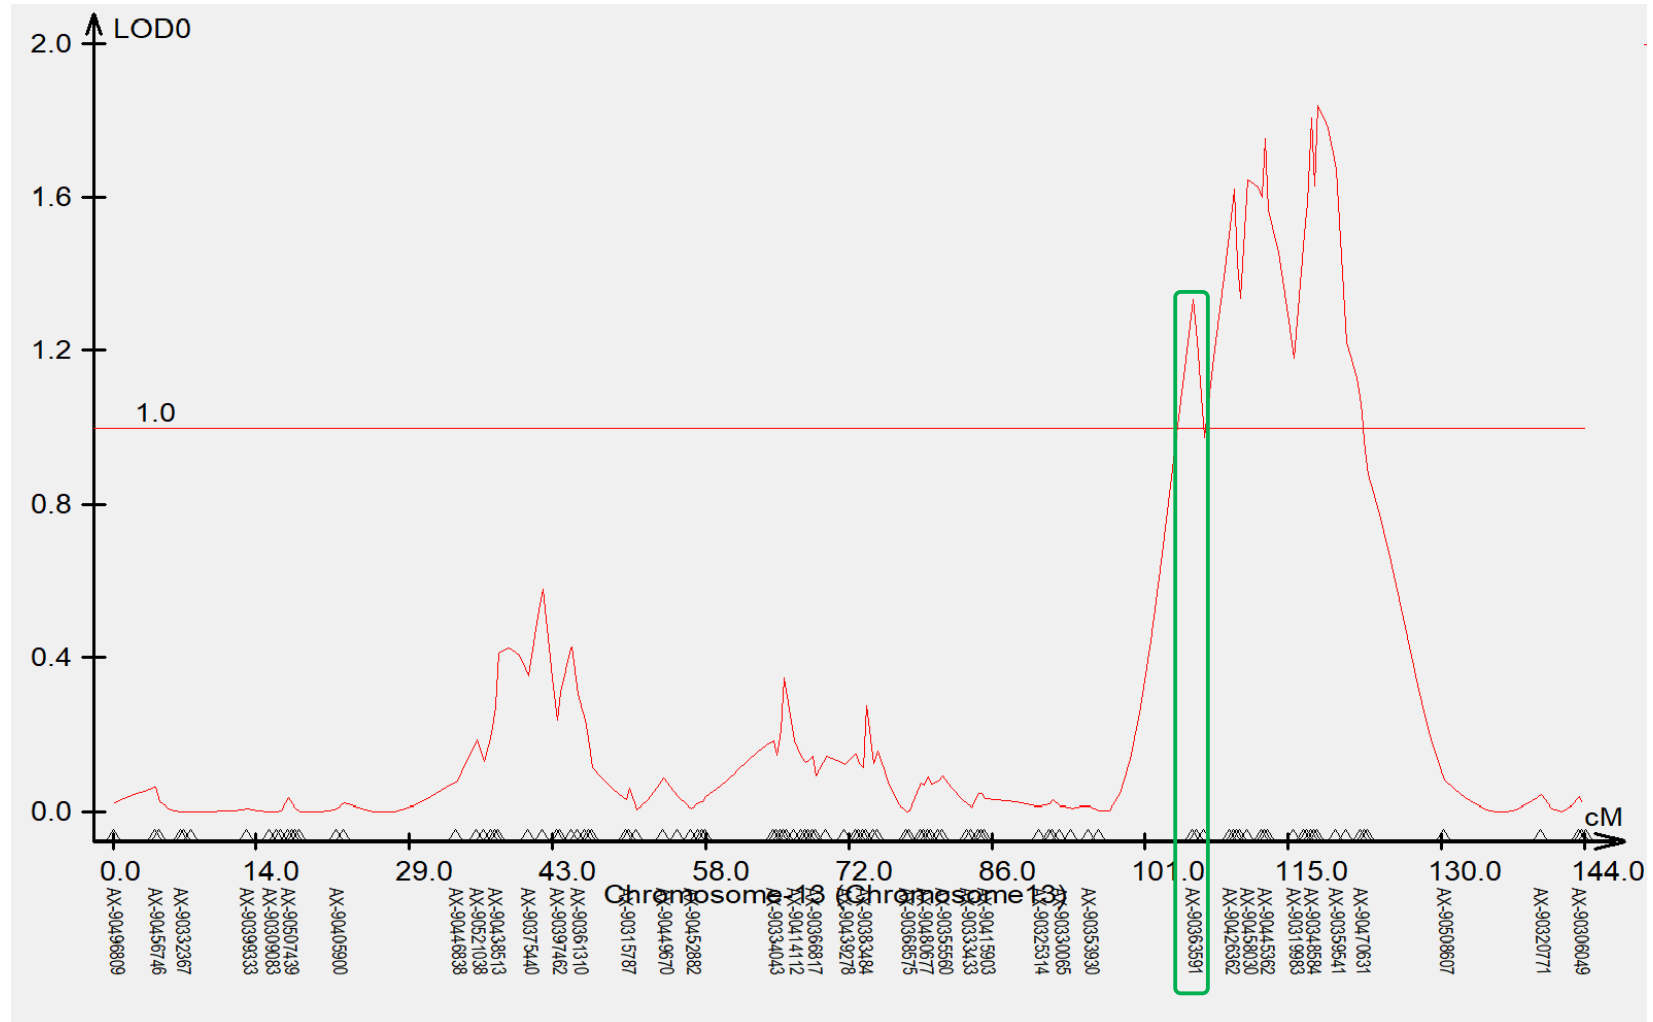

# AX-90445362

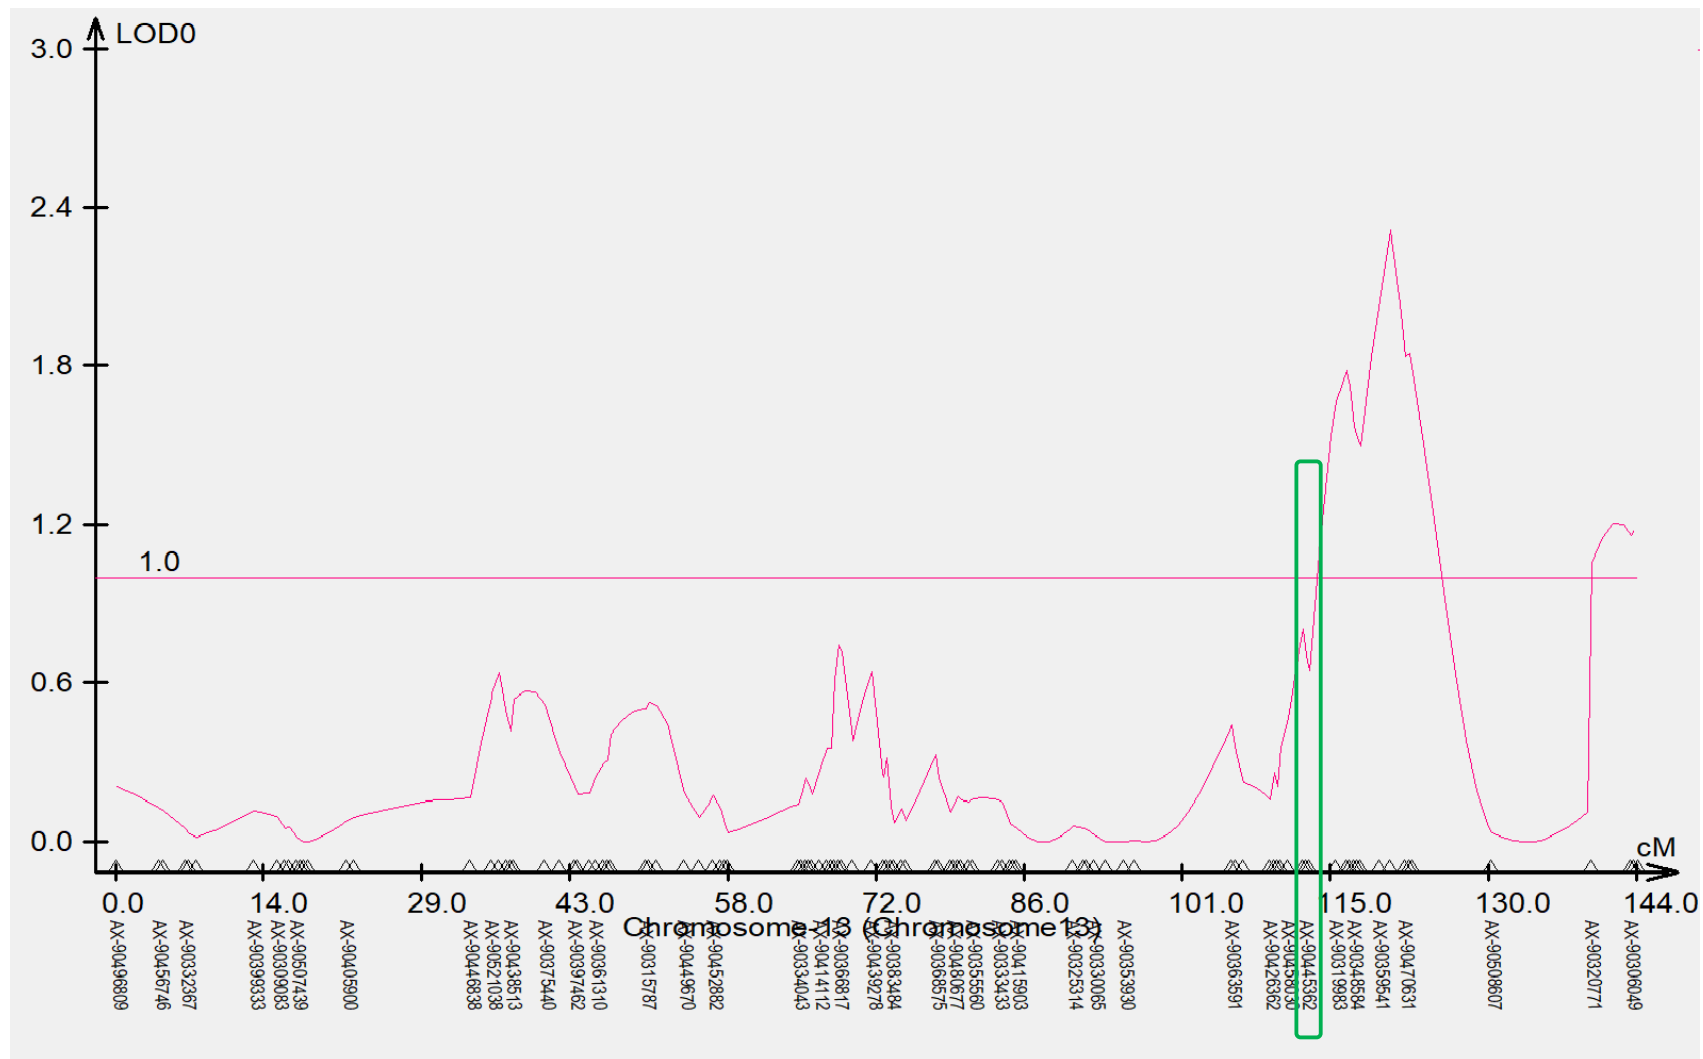

Supplement: s1 [file s1 › Supplementary files_agronomy-1150316/Supplementary Figure S3.pdf]
